# Supplementary material for: Neural machine translation of chemical nomenclature between English and Chinese
Source: J Cheminform. 2020 Aug 31;12:50. doi: 10.1186/s13321-020-00457-0 (PMC7460765; doi:10.1186/s13321-020-00457-0)
Supplement: Supplementary file 1 — Additional file 1: Training data set. [file 13321_2020_457_MOESM1_ESM.xlsx]

## Sheet: Data_CH2EN
Source Name	Target Name
锕	actinium
氨	ammonia
铵	ammonium
胺	amine
奥	azulene
钯	palladium
苝	perylene
钡	barium
苯	benzene
铋	bismuth
铂	platinum
钚	plutonium
氚	tritium
醇	alcohol
氮	nitrogen
氘	deuterium
锝	technetium
镝	dysprosium
碲	tellurium
碘	iodine
铥	thulium
氡	radon
苊	acenaphthene
蒽	anthracene
铒	erbium
矾	vanadium
钒	Vanadium
菲	phenanthrene
酚	phenol
砜	sulphone
氟	fluorine
福	thiram
钆	gadolinium
钙	calcium
钢	steel
锆	zirconium
镉	cadmium
铬	chromium
汞	mercury
钴	cobalt
胍	guanidine
硅	silicon
铪	hafnium
氦	helium
钬	holmium
镓	gallium
钾	potassium
碱	alkaline
金	gold
茎	stem
腈	nitrile
肼	hydrazine
酒	ethanol
锎	californium
钪	scandium
氪	krypton
醌	chinone
铼	rhenium
镧	lanthanum
铑	rhodium
镭	radium
锂	lithium
钌	ruthenium
磷	phosphorus
硫	sulfur
镥	Lutetium
铝	aluminium
氯	chlorine
酶	enzyme
镁	magnesium
猛	manganese
锰	manganese
钼	molybdenum
镎	neptunium
钠	sodium
氖	neon
萘	Naphthalene
铌	niobium
尿	urine
脲	urea
镍	nickel
钕	neodymium
硼	boron
铍	beryllium
芘	pyrene
氕	Protium
镨	praseodymium
铅	lead
氢	hydrogen
氰	cyanide
屈	chrysene
醛	aldehyde
人	human
铷	Rubidium
铯	Cesium
晒	Se
钐	samarium
砷	arsenic
铈	Cerium
水	water
锶	Strontium
酸	acid
铊	thallium
肽	peptide
钛	titanium
钽	tantalum
炭	carbon
碳	carbon
糖	sugar
铽	terbium
锑	antimony
铁	iron
铜	copper
酮	ketone
钍	thorium
钨	tungsten
芴	fluorene
烯	copaene
硒	selenium
锡	tin
氙	xenon
锌	zinc
溴	bromine
氩	argon
盐	sodium chloride
氧	oxygen
铱	iridium
钇	yttrium
镱	ytterbium
铟	indium
银	silver
茚	indene
铀	uranium
铕	Europium
薁	azulene
锗	germanium
脂	lipid
樟烯	comphene
沼气	methane
蔗糖	sucrose
蒸汽	vapor
诊断	diagnosis
预后	prognosis
余氯	chlorine, residual
云母	mica
孕酮	progesterone
晕苯	coronene
甾醇	sterol
甾萜	gonaterpine
甾烷	sterane, C29
皂甙	saponin
皂苷	saponin
皂黄	metanil yellow
皂石	saponite
皂素	diosgenin
皂土	bentonite
粘土	montmorillonite
樟脑	camphor
脂肪	fat
脂酶	lipase
脂质	lipid
植醇	phytol
植酸	phytic acid
植酮	phytone
植烷	phytane
植烯	phytene
酯酶	esterase
质子	Proton
蛭石	vermiculite
中子	neutron
仲胺	secamine
重钙	calcium triple superphosphate
重水	deuterated water
朱砂	cinnabar
苧醇	thujol
苧烯	limonene
铸钢	steel
铸铁	cast iron
苎烯	limonene
梓醇	catalpol
紫精	viologen
紫铜	copper
总氮	nitrogen, total
总镉	cadmium, total
总铬	chromium, total
总汞	mercury, total
总钾	potassium, total
总磷	phosphorus, total
总硫	sulfur, total
总氯	chlorine, total
总铅	lead, total
总砷	arsenic, total
总碳	carbon, total
总糖	total sugar
总铁	iron, total
总铜	copper, total
总硒	selenium, total
总锌	zinc, total
总酚	total phenol
总钙	calcium, total
组胺	histamine
唑醚	pyraclostrobin
铀酰	uranyl
柚苷	naringin
油胺	oleylamine
油醇	oleyl alcohol
油酸	Oleic acid
茚满	hydrindene
吲嗪	indolizine
隐酮	cryptone
荧蒽	fluoranthene
荧石	fluorite
萤蒽	fluoranthene
硬碳	hard carbon
引物	primer
吲哚	indole
银氨	silver ammonia
乙酯	ethyl ester
已酸	hexanoic acid
蚁酸	formic acid
乙酮	ethanone
乙烷	ethane
乙烯	ethylene
乙酰	acetyl
异腈	isocyanide
胰酶	pancreatin
乙胺	ethylamine
乙苯	ethylbenzene
乙醇	ethanol
乙酐	acetic anhydride
伊红	eosin
乙腈	acetonitrile
乙醚	aether
乙铝	phosethyl Al
乙醛	acetaldehyde
乙炔	acetylene
乙酸	acetic acid
氧芴	dibenzofuran
氧气	oxygen
叶醇	cis-3-hexene-1-ol
叶醛	leaf aldehyde
叶酸	folic acid
液氨	ammonia
液氮	liquid nitrogen
液碱	sodium hydroxide
液氯	chlorine
液溴	bromine
盐水	brine
盐酸	hydrochloric acid
岩盐	halite
氩气	argon
烟嘧	nicosulfuron
烟碱	nicotine
烟酸	nicotinic acid
烟酮	tabanone
菸酸	nicotinamide
亚铁	ferrous ion
血糖	glucose, blood
血氧	oxygen, blood
血脂	triglyceride, plasma
亚胺	imine
溴苯	bromobenzene
溴苄	bromobenzyl
溴仿	bromoform
溴素	bromine
序列	nucleotide sequence
血氨	ammonia, blood
血钙	calcium
血钾	potassium
血磷	phosphorus
血氯	chloride
血钠	sodium
血清	blood serum
锌粉	zinc
锌盐	zinc ion
新红	new red
胸苷	thymidine
雄黄	realgar
雄酮	androsterone
笑气	nitrous oxide
榍石	sphene
辛胺	octylamine
辛醇	octanol
辛醚	octyl ether
辛酸	octanoic acid
辛醛	octanal
辛酮	Octanone
辛烷	Octane
辛烯	octene
酰氯	acyl chloride
腺苷	Adenosine
香茅	citronella
骁悉	CellCept
硝氨	ammonium nitrate
硝铵	ammonium nitrate
硝胺	nitramine
硝氮	nitrate nitrogen
硝磺	mesotrione
硝石	potassium nitrate
硝酸	nitric acid
硝酮	nitrone
酰胺	amide
酰脲	ureide
纤维	cellulose
霞石	Nepheline
先锋	cephalosporin
硒酸	Selenic acid
矽尘	silica
烯烃	olefin
烯肟	SYP-1620
芴酮	fluorenone
戊烯	pentene
戊糖	pentose
戊酮	pentanone
戊烷	pentane
戊醇	pentanol
戊腈	pentylnitrile
戊醛	pentanal
戊酸	pentanoic acid
钨酸	tungstic acid
温度	temperature
文石	aragonite
肟菌	trifloxystrobin
钍石	thorite
吐温	tween
脱氮	nitrogen, removal
土酸	niobium hydroxide
酮9	ketone 9
铜盐	copper, salt
铜氨	cuprammonia
铜仿	curprophane
铜粉	copper
铁屑	iron
铁盐	iron, salts
酮体	ketone
妥泰	topiramate
瓦斯	methane
万珂	bortezomib
王水	aqua regia
王铜	copper oxychloride
微硅	micropowder silica
卫福	Vitavax
未知	unknown
味精	L-Glutamic acid, monosodium salt
胃酸	gastric acid
铁粉	iron
铁红	ferric oxide
铁磷	iron phosphorus
甜醇	dulcitol
萜烷	terpane
萜烯	kautchin
锑华	valentinite
提取	extraction
特普	tetraethyl pyrophosphate
糖醇	furfurol
糖元	glycogen
糖原	glycogen
糖精	saccharin
糖醛	furfural
桃胶	peach gum
陶瓷	ceramic composites
陶粒	haydite
陶土	argilla
碳粉	carbon
碳钢	steel, carbon
炭黑	black carbon
碳铵	ammonium carbonate
碳黑	carbon black
碳氢	carbon hydrogen
碳素	carbon
碳酸	carbonic acid
碳源	carbon
羰基	carbony
钛白	titanium dioxide
肽酶	peptidase
肽素	copeptin
肽氮	peptide nitrogen
钛硅	titanium silicalite
钛酸	titanic acid
钛铁	ferrotitanium
泰能	Tienam
泰素	taxol
酞菁	phthalocyanine
太安	pentaerythritol tetranitrate
太根	triethylene glycol dinitrate
他汀	statin
羧酸	carboxylic acid
缩醛	acetal
速尿	furosemide
蒜酶	alliinase
蒜素	allicin
梭曼	soman
羧基	carboxyl
四糖	tetrasaccharide
松萜	pinene
松香	rosin
司班	Span
丝素	silk fibroin
霜脲	cymoxanil
水分	water
水份	water
水汽	water
舒泰	Zoletil
曙红	tetrabromofluorescein
树胶	gum
树脂	resin
双酚	bisphenol
顺铂	cisplatin
顺酐	maleic anhydride
世高	difenoconazole
瘦素	leptin
叔胺	tertiary amine
石英	quartz
食盐	sodium chloride
石粉	calcium carbonate
石膏	gypsum
石灰	lime
石蜡	paraffin
石墨	graphite
麝香	musk
砷酸	arsenic acid
砷盐	arsenic, salts
闪石	amphibole
善达	starch
善宁	sandostatin
烧碱	caustic soda
山酸	behenic acid
肾素	renin
升汞	mercury bichloride
尸胺	cadaverine
失水	water, loss
鲨烯	2,6,10,14,18,22-tetracosahexaene
沙林	sarin
砂糖	sugar
色胺	tryptamine
色醇	tryptophol
三嗪	triazine
三萜	triterpene
三氧	ozone
三唑	triazole
肉碱	carnitine
乳酸	lactic acid
乳糖	lactose
溶氧	oxygen, dissolved
鞣酸	tannic acid
鞣质	tannin
乳酯	lactate
软玉	Nephrite
软碳	soft carbon
瑞代	Ruidai
瑞素	Fresubin
噻吩	thiophene
噻酮	thiazone
噻唑	thiazole
三胺	triamine
三氯	plifenate
惹烯	retene
热水	water, hot
缺氧	hypoxia, animal
壬醇	nonanol
壬酚	nonyl phenol
壬胺	nonylamine
壬腈	nonylnitrile
壬醛	nonanal
壬酸	nonanoic acid
壬烯	1-nonene
壬酮	nonanone
壬烷	nonane
全碳	carbon, total
全铁	iron, total
全铜	copper, total
全锌	zinc, total
全钙	calcium, total
全钾	kalium,total
全磷	phosphorus, total
全硫	sulfur, total
全镁	magnesium, total
全锰	manganese, total
全镍	nickel, total
全铅	lead, total
全N	nitrogen, total
全P	phosphorus, total
全氮	nitrogen, total
曲酸	kojic acid
琼脂	agar
琼胶	agar
巯基	sulfhydryl
清水	water
氢气	hydrogen
氰胺	cyanoamine
氰根	cyanogen
青铜	bronze
青石	bluestone
氢键	hydrogen bond
氢醌	hydroquinone
铅矾	sardinianite
茜素	alizarin
羟胺	hydroxylamine
羟基	hydroxyl
羟嗪	hydroxyzine
茄酮	solanone
镨黄	Praseodymium Yellow
七氯	heptachlor
漆酚	urushiol
漆酶	laccase
汽油	gasoline
普钙	calcium superphosphate
贫铀	depleted uranium
嘌呤	purine
品红	fuchsine
片碱	caustic soda
砒霜	arsenic trioxide
偏腙	partial hydrazone
扑灭	propazine
葡糖	glucose
硼砂	borax
硼酸	boric acid
硼铁	ferroboron
硼烷	borane
硼钢	boron steel
哌啶	piperidine
哌喹	piperaquine
哌嗪	piperazine
蒎烷	pinane
蒎烯	pinene
潘糖	panose
纽甜	neotame
农达	Roundup
诺帝	Nordy
诺龙	nandrolone
偶氮	sulphonazo
柠烯	limonene
脲酶	urease
脲醛	urea formaldehyde
脲氮	urea nitrogen
尿烷	ethyl carbamate
镍磷	Nickel phosphide
宁烯	limonene
尿碘	iodine
鸟苷	guanosine
铌铁	ferroniobium
尿钙	calcium, urinary
尿苷	uridine
尿钾	potassium, urinary
尿酶	urease
尿钠	sodium, urinary
尿素	urea
尿酸	uric acid
尿糖	glucose, urinary
尼辛	nisin
尼森	Nisin
铌酸	niobic acid
霓石	aegirine
尼龙	nylon
萘胺	naphthylamine
萘酚	naphthol
氖气	neon
钠氢	sodium hydride
钠土	montmorillonite
钠盐	sodium salt
萘醌	naphthoquinone
萘酮	naphthaleneone
萘烷	decahydronaphthalene
内酯	lactone
钼铁	ferromolybdenum
钼酸	molybdic acid
钼华	molybdine
钼蓝	Molybdenum blue
明胶	gelatin
明矾	alum
魔芋	konjac gum
莫烷	moretane
木钠	sodium ligninsulfonate
木素	lignin
木炭	charcoal
木糖	xylose
锰钢	Steel, manganese
镁砂	magnesium oxide
镁盐	magnesium, salts
门布	MBOA
美蓝	methylene blue
美能	Stronger neo-minophagen-C
美平	mepem
煤油	kerosene
锰砂	manganese
锰铁	ferromanganese
锰锌	mancozeb
咪唑	imidazole
醚胺	ether amine
米铂	miriplatin
糜酶	chymase
嘧啶	pyrimidine
棉酚	gossypol
棉隆	dazomet
氯氨	monochloramine
氯苯	chlorobenzene
氯胺	chloramine
氯苄	benzyl chloride
氯虫	chlorantraniliprole
氯丹	chlordane
铝粉	aluminium, powder
铝基	aluminum matrix
铝胶	aluminium hydroxide
铝磷	aluminum phosphorus
铝盐	aluminum, salts
绿矾	copperas
隆朋	Rompum
芦丁	rutin
龙脑	borneol
硫甙	glucosinolate
硫丹	endosulfan
硫苷	glucosinolates
硫黄	Sulfur
硫芥	Sulfur mustard
硫堇	thionine
硫磷	parathion
硫磺	sulfur
硫醚	sulfur ether
硫脲	thiourea
硫素	sulfur
硫酸	sulfuric acid
硫芴	dibenzothiophene
氯仿	chloroform
氯酚	chlorophenol
氯根	chloride
氯碱	chlor-alkali
氯喹	chloroquine
氯气	chlorine
氯球	chloromethylated polystyrene
氯水	chlorine water
氯酸	chloric acid
氯盐	chloride
洛铂	lobaplatin
吗啡	morphine
吗啉	morpholine
芒硝	mirabilite
硫醇	mercaptan
硫铵	ammonium sulfate
硫胺	thiamine
磷酯	lecithin
膦酸	phosphonic acid
磷铁	ferro-phosphorus
磷烷	phosphine
磷烯	phosphorene
磷脂	phospholipid
磷素	phosphorus
磷酸	phosphoric acid
磷胺	phosphamidon
林丹	lindane
磷腈	phosphazene
钌红	ruthenium red
亮绿	bright green
亮黑	Brilliant Black PN
亮黄	brilliant yellow
亮蓝	brilliant blue
沥青	asphalt
栎精	quercetin
莲碱	roemerine
联氨	diamide
联胺	diamide
联苯	biphenyl
联苄	bibenzyl
锂盐	lithium, salts
力肽	dipeptiven
酪胺	tyramine
酪醇	tyrosol
酪酸	butyric acid
乐果	dimethoate
蜡酸	cerotic acid
辣素	capsaicin
葵烷	decane
葵醛	decanal
葵酸	decanoic acid
奎宁	quinine
喹啉	quinoline
枯醇	kakuol
枯烯	isopropylbenzene
康醛	heptanal
糠胺	furfurylamine
糠醇	furfuryl alcohol
糠醛	furfural
糠酸	2-furancarboxylic acid
柯因	Chrysin
卡松	kathon
蒈醇	caraneol
蒈烷	carane
蒈烯	carene
凯松	Kathon
莰醇	camphanol
莰酮	camphor
莰烷	camphane
莰烯	camphene
卡铂	carboplatin
聚酯	polyester
咔唑	carbazole
聚硫	polysulfide
聚铝	polyaluminum chloride
聚醚	polyether
聚脲	polyurea
聚糖	glycan
聚铁	polyferric
聚芴	polyfluorene
酒度	alcohol
酒精	ethanol
九氯	trichlor
精脒	spermidine
精胺	Spermine
菊粉	inulin
菊酸	chrysanthemic acid
菊糖	inulin
菊烯	chrysanthene
聚砜	polysulfone
晶硅	crystalline silicon
芥酸	erucic acid
健择	gemcitabine
姜醇	zingiberol
姜酚	gingerol
姜酮	gingerone
姜烯	zingiberene
胶原	collagen
角质	cutin
酵母	yeast
钾素	potassium
甲臜	formazan
甲酯	methyl ester
甲烷	methane
甲维	emamectin benzoate
甲醚	methyl ether
甲醛	formaldehyde
甲霜	metalaxyl
甲酸	formic acid
甲铵	ammonium carbamate
甲胺	methylamine
甲拌	phorate
甲苯	toluene
甲醇	methanol
甲酚	cresol
甲基	methyl
霍烷	hopane
藿烷	hopane
肌醇	inositol
肌肝	creatinine
肌苷	inosine
肌酐	creatinine
肌酸	creatine
肌肽	carnosine
积炭	carbon
基因	gene, animal, accession number: NM_000971
激酶	kinase
激素	dexamethasone
棘苷	spinosin
己胺	hexylamine
己醇	hexanol
己腈	hexylnitrile
己醛	hexanal
己酸	hexanoic acid
己糖	hexose
己酮	hexanone
己烷	hexane
己烯	hexene
己酯	hexyl ester
氦气	helium
焊锡	stannum
蒿醇	artemisia alcohol
蒿脑	estragole
蒿酮	artemisia ketone
海酮	calone
海盐	sea salt
海因	hydantoin
核苷	glucosamine
核酶	ribozyme
核酸	nucleic acid
核糖	ribose
贺斯	hydroxyethylstarch
黑硅	black silicon
黑精	melanoidin
黑磷	phosphorene
黑炭	black carbon
黑碳	black carbon
黑素	melanin
黑药	aerofloat
红磷	red phosphorus
红糖	brown sugar
冠醚	18-crown-6
光气	phosgene
胱胺	cystamine
硅粉	silicon
硅钙	silica-calcium
硅钢	steel, silicon
硅灰	silica
硅胶	silica gel
硅砂	silica sand
硅石	silica
硅酸	silicic acid
瓜胶	guar gum
胍胶	Guar gum
固绿	fast green
钴蓝	Cobalt Blue
骨肽	ossotide
硅铁	ferrosilicon
硅酮	silicone
硅烷	silicane
硅烯	silicene
硅油	silicone oil
硅质	silicon
癸胺	decylamine
癸醇	decanol
癸醚	didecyl ether
癸醛	decanal
癸酸	decanoic acid
癸酮	4-decanone
癸烷	decane
癸烯	decene
桂醛	cinnamaldehyde
桂酸	cinnamic acid
果胶	pectin
果糖	fructose
果酸	malic acid
庚酮	heptanone
庚烷	heptane
庚烯	heptene
功夫	cyhalothrin
铬酸	chromic acid
铬铁	ferrochromium
庚胺	heptylamine
庚醇	heptanol
铬绿	Chrome Green
庚醛	heptanal
庚酸	heptanoic acid
铬粉	chromate
铬酐	chromic anhydride
高氧	oxygen
睾酮	testosterone
睾丸	testosterone
钢板	steel
钢棒	Steel
钢筋	steel
钢铁	steel
刚玉	corundum
高氯	beta-cypermethrin
高糖	glucose, high
肝素	heparin
肝糖	glycogen
苷元	aglycon
钙剂	calcium
钙磷	calcium phosphorus
钙素	calcium
钙盐	calcium salt
钙质	calcium
盖诺	vinorelbine
干冰	carbon dioxide
甘醇	glycol
甘油	glycerol
鲎素	tachyplesin
糊精	dextrin
槐糖	sophorose
环烯	cyclene
黄金	gold
黄磷	phosphorous
黄铜	brass
黄酮	flavone
黄药	xanthate
黄玉	topaz
磺胺	sulfanilamide
磺脲	sulphonylureas
磺酸	sulfonic acid
辉石	pigeonite
茴脑	anethole
桧醇	sabinol
桧脑	juniper camphor
桧萜	sabinene
桧酮	sabinaketone
桧烯	sabinene
复氧	oxygen, biological studies, reoxygenation
福星	flusilazole
辅酶	coenzyme
腐胺	putrescine
氟碳	perfluorocarbon
氟烷	halothane
氟苯	fluorobenzene
封醇	fenchol
葑酮	fenchone
葑烯	fenchene
葑醇	fenchanol
酚醛	phenol, polymer with formaldehyde
酚酸	phenolic acid
酚酞	phenolphthalein
呋喃	furan
酚红	phenol red
吩嗪	phenazine
榧素	dendrolasin
菲啶	phenanthridine
菲醌	Phenanthrenequinone
菲汀	phytin
翡翠	jadeite
沸石	zeolite
沸水	water
芳醛	aromatic aldehyde
钒铁	ferrovanadium
泛醇	dexpanthenol
泛醌	Ubiquinone
泛素	ubiquitin
泛酸	pantothenic acid
芳胺	ary1amines
蒽醌	anthraquinone
蒽酮	anthrone
恶霜	oxadixyl
恶唑	oxozole
苊醌	acenaphthenequinone
苊烯	acenaphthylene
恩度	endostar
噁霜	oxadixyl
噁唑	oxazole
多胺	polyamine
多巴	dopa
多酚	polyphenol
多肽	polypeptide
多糖	polysaccharide
二酚	xylenol
二嗪	diazine
顶尖	Topik
丁酯	butyl ester
丁酮	butanone
丁烷	butane
丁烯	butylene
毒死	chlopyrifos
杜烯	durene
椴苷	tiliroside
碘仿	iodoform
碘伏	iodophor
碘苯	iodobenzene
碘酸	iodic acid
碘油	lipiodol
碘值	iodine, value
电石	calcium carbide
电子	electron
淀粉	starch
靛红	isatin
靛青	indigotin
靛蓝	indigo
丁胺	butylamine
蝶酸	pteroic acid
丁苯	butyl benzene
丁布	DIMBOA
丁醇	butanol
丁黄	butyl xanthate
丁腈	butyronitrile
丁硫	carbosulfan
丁醚	butyl ether
丁脒	butyrimidamide
丁醛	butyraldehyde
丁炔	butine
丁酸	butyric acid
涤纶	Dacron
敌稗	propanil
氮芥	nitrogen mustard
氮酮	Azone
氮气	nitrogen
氮素	nitrogen
氮源	nitrogen
胆酸	cholic acid
胆盐	bilesalt
蛋白	protein
醇胺	alkanolamine
纯水	water
纯钛	titanium
纯铜	pure copper
纯碱	sodium carbonate
纯金	pure gold
醇醚	alcohol ether
茨醇	borneol
茨酮	camphor
茨烯	camphene
雌黄	orpiment
雌酮	estrone
枞酸	abietic acid
粗苯	benzene, crude
醋酐	acetic anhydride
醋酸	acetic acid
醋翁	3-hydroxy-2-butanone
醋嗡	acetoin
翠蓝	Turquoise Blue
哒嗪	pyridazine
大隆	brodifacoum
丹宁	tannin
单嘧	monosulfuron
单宁	tannin
胆矾	chalcanthite
胆碱	choline
卟啉	protoporphyrin
补体	complement
残炭	carbon, residual
草屈	guanidine
草酸	oxalic acid
丙酯	propyl ester
玻璃	glass
丙烷	propane
丙烯	propylene
草烯	oxalene
岑酮	fraxinellone
梣酮	fraxinellone
茶碱	theophylline
柴油	diesel oil
长石	Perthite
超氧	superoxide
辰砂	cinnabar
橙酮	aurone
赤磷	red phosphorus
臭氧	ozone
除尽	chlorfenapyr
除磷	phosphorous, removal
触酶	catalase
铋华	malachite
苄胺	benzylamine
吡嗪	pyrazine
吡蚜	pymetrozine
吡唑	pyrazole
吡铂	picoplatin
吡啶	pyridine
吡咯	pyrrole
吡喃	Pyran
苯醌	benzoquinone
苯醚	Phenyl ether
苯炔	benzyne
苯酞	phthalide
比久	daminozide
苄醇	benzyl alcohol
苄腈	benzonitrile
苄氯	benzyl chloride
苄醚	benzyl ether
苄溴	benzyl bromide
骠马	fenoxaprop-ethyl
冰毒	methamphetamine
冰片	borneol
冰水	ice water
丙胺	propylamine
丙苯	propyl benzene
丙醇	propanol
丙腈	propionitrile
丙纶	polypropylene
丙醛	malondialdehyde
丙炔	propyne
丙酸	propanoic acid
丙酮	acetone
苯胺	aniline
贝特	fibrate
贝依	Leuprorelin Acetate
棒酸	clavulanic acid
胞苷	cytidine
白糖	sugar
柏烯	cupressene
苯醇	alcohol benzene
苯酚	phenol
苯酐	phthalic anhydride
苯环	benzene ring
苯甲	Difenoconazole
苯腈	benzonitrile
苯肼	phenylhydrazine
钯炭	Pd/C
钯碳	palladium on carbon
巴沙	baycard
白矾	alum
巴丹	cartap
凹土	attapulgite
奥铂	oxaliplatin
铵盐	ammonium
氨氧	ammonia nitrogen
胺基	amino group
铵氮	ammonium nitrogen
铵根	ammonium
氨纶	polyurethane
氨气	ammonia
氨水	ammonia
氨基	ammonium
氨氮	ammonia nitrogen
氨根	ammonium
安坦	artane
桉醇	globulol
艾醇	yomogi alcohol
爱苗	Aimiao
安定	diazepam
安果	formothion
阿维	abamectin
吖啶	acridine
C肽	C peptide
H酸	1-amino-8-naphthol-3, 6-disulfonic acid
q酶	Q enzyme
P物质	substance P
Pd钯	palladium
PT酸	p-toluic acid
MS酸	Murashige and Skoog's
In铟	indium
C-肽	C-peptide
B因子	complement factor B
C1酶	C1 cellulase
Cd镉	cadmium
吖啶橙	acridine orange
吖啶红	acridine red
吖啶黄	acridine yellow
吖啶酮	acridone
吖丙啶	aziridine
阿法根	alphagan
阿藿烯	ajoene
阿胶糖	arabinose
阿坎酸	acamprosate
阿克苷	acteoside
阿克泰	carbosulfan
Sr锶	strontium
X因子	Blood-coagulation factor X
阿维A	acitretin
阿散酸	arsanilic acid
阿托品	atropine
阿托醛	atropaldehyde
阿魏酸	ferulic acid
阿力甜	alitame
阿洛糖	allose
阿霉素	adriamycin
阿玛碱	ajmalicine
阿片肽	opioid peptide
矮壮素	chlorocholine chloride
安氟醚	enflurane
安硫磷	formothion
安眠酮	methaqualone
安灭菌	amoxicillin
安钠咖	caffeine sodium benzoate
安乃近	analgin
安曲南	aztreonam
安塞蜜	acesulfame
安赛蜜	acesulfame potassium
安尔碘	Entoiodine
艾氏剂	aldrin
艾试剂	Aldrin
艾薇醛	evertal
爱草脑	estragole
爱可松	Esmeron
艾黄素	artemetin
艾美乐	imidacloprid, water dispersible granules
阿卓糖	altrose
埃洛石	halloysite
癌泰得	Cantide
桉树醇	cineole
桉树脑	eucalyptol
桉树烯	aromadendrene
安泰生	antracol
安妥明	atromide
安息香	benzoin
桉叶醇	eucalyptol
安锥赛	Antrycide
桉叶脑	eucalyptol
桉叶素	cineole
桉油醇	Eucalyptol
桉油精	eucalyptol
桉油素	eucalyptol
桉油烯	eucalyptol
氨磺酸	sulfamate
氨茶碱	aminophylline
氨苄青	ampicillin
桉叶烯	eudesmene
桉脂素	eudesmin
氨苯砜	dapsone
氨基苯	aminobenzene
氨基氮	amino nitrogen
氨基酚	aminophenol
氨基胍	aminoguanidine
氨基钠	sodium amide
氨基脲	semicarbazide
氨基氰	cyanamide
氨基酸	amino acid
氨态氮	ammonia nitrogen
氨肽酶	aminopeptidase
氨曲南	aztreonam
氨硼烷	ammonia borane
氨溴索	ambroxol
氨酪酸	aminobutyric acid
氨力农	amrinone
氨磷汀	amifostine
胺丙畏	propetamphos
胺碘酮	amiodarone
胺磺灵	oryzalin
胺菊酯	tetramethrin
胺鲜酯	aminoacyl ester
胺硝草	pendimethalin
铵离子	ammonium ion
铵明矾	ammonium aluminum sulfate
铵态氮	ammonium nitrogen
凹凸棒	palygorskite
奥复星	ofloxacin
奥曲肽	octreotide
奥利烷	Oleanane
奥氮平	Olanzapine
奥氏体	austenite
奥硝唑	ornidazole
八氟萘	octafluoronaphthalene
八甘醇	octaethylene glycol
巴豆醇	crotyl alcohol
巴豆苷	isoguanosine
巴豆醛	crotonaldehyde
巴豆酸	Crotonic acid
巴比妥	barbital
巴毒磷	crotoxyphos
巴氯芬	baclofen
白果醇	ginnol
白果素	Bilobetin
白菖酮	shyobunone
白菖烯	calamene
白蛋白	albumin
巴马汀	palmatine
巴马亭	palmatine
巴曲酶	batroxobin
巴曲亭	hemocoagulase atrix
白氨酸	leucine
白菜素	bergenin
钯离子	palladium, ion
苯菌灵	benomyl
苯菌酮	metrafenone
苯甲酮	benzophenone
苯甲肟	benzenecarbooxime
苯甲酸	benzoic acid
苯甲胺	benzenemethanamine
苯己醇	phenyl hexenol
苯己酮	benzenehexanone
苯甲醇	benzyl alcohol
苯甲腈	benzonitrile
苯甲精	benzonitrile
苯甲醚	anisole
苯甲脒	benzamidine
苯甲醛	benzaldehyde
苯磺酸	benzenesulfonic acid
苯基汞	phenyl mercury
苯基醚	phenyl ether
苯基氰	phenylcyano
苯磺隆	tribenuron-methyl
苯酚钠	sodium phenolate
苯福林	phenylephrine
苯海索	trihexyphenidyl
苯庚酸	Phenyl enanthic acid
苯庚酮	benzeneheptanone
苯酚红	Phenol red
苯达松	bentazon
苯丁醛	benzenebutanal
苯丁锡	fenbutatin oxide
苯恶威	bendiocarb
苯二胺	diaminobenzene
苯二酚	dihydroxybenzene
苯并蒽	benzoanthracene
苯并芘	benzo[a]pyrene
苯并苝	Benzoperylene
苯并菲	triphenylene
苯胺蓝	aniline blue
苯胺灵	propham
苯丙胺	amphetamine
苯丙醇	phenylpropanol
苯丙腈	benzenepropanenitrile
苯丙芘	benzo pyrene
苯丙醛	benzenepropanal
苯丙酸	phenylpropionic acid
苯丙烷	phenylpropanoid
苯丙酮	propiophenone
柏木酮	cedrone
柏木烷	cedrene
柏木烯	Cedrene
百泌达	exenatide
百普力	baipuli
百治磷	dicrotophos
柏黄酮	cupresuflavone
柏林醇	Berlin alcohol
柏木醇	cedrol
柏木脑	cedrol
拜虫杀	Responsar
拜唐苹	acarbose
拜糖平	acarbose
斑螯素	cantharidin
斑蝥黄	canthaxanthin
斑蝥素	cantharidin
斑蝥酸	cantharidic acid
白炭黑	silica, fumed
白碳黑	white carbon black
白鲜碱	dictamnine
白藓碱	dictamnine
白消安	busulfan
白杨素	chrysin
百草枯	paraquat
百毒杀	didecyl dimethyl ammonium bromide
百菌清	chlorothalonil
百可得	bellkute
百里酚	thymol
白云石	dolomite
百里醌	thymoquinone
白陶土	kaolinite
白铁矿	marcasite
白钛矿	white ilmenite
白钛石	leucoxene
白铅矿	cerussite
白三烯	leukotriene
白砂糖	sugar, granulated
白芍苷	albiflorin
白桦醇	betulinol
白桦酸	betulinic acid
白菊酮	chrysanthone
白菌清	2,4,5,6-tetrachloro-1,3-benzene dicarbonitrile
白糊精	dextrin, white
白榴石	leucite
白麻苷	baimaside
白茅素	cylindrin
白霉素	albomycin
胞苷酸	cytidine monophosphate
胞嘧啶	cytosine
胞外酶	extracellular enzyme
保棉磷	azinphos-methyl
保泰松	phenylbutazone
保险粉	sodium hydrosulfite
棓丙酯	propylgallate
拌种灵	amicarthiazol
包罗醛	boronal
胞壁酸	muramic acid
半夏酸	pinellic acid
半纤维	hemicellulose
半胱胺	cysteamine
半乳糖	galactose
倍硫磷	fenthion
钡玻璃	barium oxide
钡长石	barium aluminum silicate
钡离子	barium ion
贝他定	Bestatin
贝他根	betagan
苯胺黑	nigrosine
本芴醇	benflumetol
倍美力	premarin
豹蛙酶	onconase
贝母素	peimisine
贝母辛	peimisine
贝尼尔	diminazene aceturate
贝诺酯	benorilate
贝氏钢	bainitic steel
贝氏体	bainite
丙酮醇	acetol
丙酸钠	sodium propionate
丙酸盐	propionate
丙炔酸	propynoic acid
丙炔溴	propyne bromine
丙三醇	glycerol
丙三酸	tricarballylic acid
丙森锌	propineb
丙酸氨	ammonium propionate
丙酸钙	calcium propionate
丙酸酐	propionic anhydride
丙炔胺	propargylamine
丙炔醇	propargyl alcohol
丙咪嗪	imipramine
丙内酯	propiolactone
丙硫醇	1-propanethiol
丙硫磷	prothiofos
丙环唑	propiconazole
丙磺舒	probenecid
丙基苯	propyl benzene
丙交酯	lactide
丙丁酚	probucol
丙二胺	1,3-diaminopropane
丙二醇	propylene glycol
丙虫磷	propaphos
丙二腈	malononitrile
丙二醛	malondialdehyde
丙二酸	malonic acid
丙二烯	propadiene
丙谷胺	proglumide
丙胺酸	alanine
丙吡胺	disopyramide
丙泊酚	propofol
丙草胺	pretilachlor
冰乙酸	glacial acetic acid
冰片烯	bornylene
丙氨酸	alanine
冰片醇	bornyl alcohol
槟榔碱	arecoline
冰醋酸	glacial acetic acid
苄基溴	benzyl bromide
表雄酮	epiandrosterone
别嘌醇	allopurinol
表睾酮	epitestosterone
表氯醇	epichlorohydrin
苄异腈	benzyl isocyanide
苄丝肼	benserazide
变色酸	chromotropic acid
苄硫醇	benzyl mercaptan
苄基醇	benzyl alcohol
苄基肼	benzylhydrazine
苄基氯	Benzyl chloride
苄基氰	benzyl cyanide
苯唑醇	1-phenyl-3-hydroxy-1,2,4-triazole
笨乙烯	styrene
崩溃酶	Driselase
苯乙酯	2-phenylethyl acetate
苯乙腈	benzyl cyanide
苯乙醚	phenetole
苯乙醛	benzeneacetaldehyde
苯乙炔	ethynylbenzene
苯乙酸	phenylacetic acid
苯乙酮	Acetophenone
苯乙烷	ethylbenzene
苯乙烯	styrene
苯妥因	phenytoin
苯戊醇	fenipenol
苯戊酮	1-pentanone, 1-phenyl-
苯芴醇	lumefantrine
苯芴酮	phenylfluorone
苯妥英	phenytoin
苯线磷	fenamiphos
苯氧威	Fenoxycarb
苯乙胺	phenylethylamine
苯乙醇	phenylethyl alcohol
苯乳酸	phenyllactic acid
苯偶酰	benzil
苯偶姻	benzoin
苯硼酸	phenylboric acid
苯噻唑	benzothiazole
苯三酚	benzenetriol
苯霜灵	benalaxyl
苯硫醇	benzenethiol
苯硫酚	thiophenol
苯硫磷	phosphonothioic acid
苯硫脲	phenylthiourea
苯硫威	fenothiocarb
吡喃糖	Pyranose
吡咯素	pyrraline
吡咯烷	pyrrolidine
吡螨胺	tebufenpyrad
吡嘧磷	pyrazophos
吡啉啶	pyridinoline
吡硫醇	pyritinol
吡草醚	pyraflufen-ethyl
吡虫啉	imidacloprid
吡虫清	acetamiprid
吡丙醚	pyriproxyfen
吡啶钌	pyridine ruthenium
吡啶啉	pyridinoline
吡多胺	pyridoxamine
吡哆胺	pyridoxamine
吡哆醇	pyridoxine
吡哆醛	pyridoxal
吡啶酚	pyridinoline
吡啶酮	pyridinone
吡菌磷	pyrazophos
吡喹酮	praziquantel
吡拉明	pyrilamine
荜茇宁	piperlonguminine
吡蚜酮	pymetrozine
吡哌酸	pipemidic acid
吡效隆	Forchlorfenuron
吡喃酮	pyrone
吡嗪酮	pymetrozine
苄草丹	prosulfocarb
苄草唑	pyrazoxyfen
扁桃腈	mandelonitrile
扁桃酸	mandelic acid
扁蓄苷	avicularin
铋离子	bismuth ion
铋酸钠	Bismuth sodium oxide
蓖麻碱	ricinine
荜茄醇	α-cadinol
碧萝芷	pycnogenol
避蚊胺	N,N-diethyl-3-methylbenzamide
除虫脲	diflubenzuron
除线磷	dichlofenthion
臭氧水	ozonic water
臭樟脑	naphthalene
除草定	bromacil
除草醚	nitrofen
虫胺磷	fenamiphos
虫草素	cordycepin
虫草酸	cordycepic acid
虫螨腈	chlorfenapyr
虫螨磷	actellic
虫螨威	carbofuran
虫螨畏	methacriphos
虫酰肼	tebufenozide
虫线磷	thionazin
赤杨酮	glutinone
臭葱石	scorodite
臭豆碱	anagyrine
赤霉素	gibberellic acid
齿孔酸	eburicoic acid
赤褐铁	hematite-limonite
赤霉酸	gibberellic acid
赤芍苷	paeoniflorin
赤铜矿	cuprite
赤藓醇	erythritol
赤藓红	erythrosine
赤藓糖	erythroose
匙桉醇	spathulenol
橙黄酮	sinensetin
橙皮甙	hesperidin
橙皮苷	hesperidin
橙皮素	hesperetin
橙色I	orange I
橙花素	aurantiol
橙花酸	neric acid
橙黄G	orange G
橙黄I	orange I
陈皮苷	hesperidin
柽柳素	tamarixetin
沉香醇	linalool
潮霉素	hygromycin
橙花醇	nerol
橙花醚	nerol oxide
橙花醛	neral
车轮矿	bournonite
长石英	feldspar
长托宁	penehyclidine hydrochloride
长春胺	vincamine
蟾毒灵	bufalin
蟾蜍灵	bufalin
菖蒲酮	shyobunone
菖蒲烯	calamene
长春碱	vinblastine
长叶醇	longifolenaldehyde
长叶醛	longifolenaldehyde
长叶烯	Longifolene
肠毒素	enterotoxin
肠二醇	enterodiol
肠激酶	enterokinase
肠内脂	enterolactone
常山碱	febrifugine
常山酮	halofuginone
超纯水	ultrapure water
茶螺酮	theaspirone
茶螺烷	theaspirane
茶氨酸	theanine
茶多酚	tea polyphenol
茶多糖	tea polysaccharides
茶褐素	theabrown
茶红素	thearubigin
茶黄素	theaflavin
查尔酮	chalcone
查耳酮	chalcone
草酰胺	oxamide
草酰氯	oxalyl chloride
侧柏醇	thujol
侧柏酮	thujone
侧柏烷	thujane
侧柏烯	α-thujene
茶色素	tea pigment
茶香酮	4-oxo-isophorone
茶叶碱	theophylline
茶皂素	theasaponin
产物1	product 1
产物2	product 2
产物3	product 3
产物4	product 4
产物5	product 5
产物6	product 6
产物7	product 7
产物8	product 8
产物9	product 9
丙烯胺	allylamine
丙烯醇	allyl alcohol
丙酮肟	acetone oxime
丙戊酸	valproic acid
丙烷脒	propamidine
丙酮醛	methylglyoxal
丙酮酸	pyruvic acid
丙烯腈	acrylonitrile
丙烯醛	acraldehyde
丙烯酸	acrylic acid
玻璃酸	hyaluronic acid
波棱素	herpetin
波立维	clopidogrel
波旁烯	bourbonene
波生坦	bosentan
丙线磷	ethoprophos
丙溴磷	profenofos
并四苯	tetracene
并五苯	pentacene
病毒灵	moroxydine
病毒唑	ribavirin
丙酰胺	propanamide
丙酰肼	propionic acid hydrazide
丙酰氯	propionyl chloride
薄荷醇	menthol
波甾醇	spinasterol
勃地龙	boldenone
勃姆石	boehmite
薄荷脑	menthol
薄荷素	bergamottin
薄荷酮	menthone
薄荷烷	diepoxy-p-menthylhept
菠菜烯	spinacene
菠萝醛	allyl caproate
菠萝酮	furanol
草酸铵	ammonium oxalate
草酸铂	oxaliplatin
草酸钙	calcium oxalate
草酸根	oxalate
草酸钴	cobalt oxalate
草酸钾	potassium oxalate
草酸锂	Lithium oxalate
草酸镁	magnesium oxalate
草酸钠	sodium oxalate
草酸铌	niobium oxalate
草酸铁	ferric oxalate
草酸铜	copper oxalate
草酸镍	nickel oxalate
草酸盐	oxalate
草酸银	silver oxalate
草酸酯	ether oxalate
灿烂绿	brilliant green
苍耳亭	xanthatin
苍术醇	Hinesol
苍术苷	atractyloside
残杀威	propoxur
苍术素	atractylodin
苍术酮	atractylon
藏红T	safranine T
草铵磷	glufosinate
草铵膦	glufosinate
草胺磷	glufosinate ammonium
草胺膦	Glufosinate-ammonium
草除灵	benazolin-ethyl
草达津	Trietazine
草达灭	molinate
草丁膦	phosphothricin
草毒死	acetamide, 2-chloro-N,N-di-2-propen-1-yl-
草甘膦	glyphosate
藏花醛	safranal
藏花素	crocin
草篙脑	grass pole brain
草蒿脑	estragole
草净津	cyanazine
草莓酯	fraistone
草灭特	cycloate
草乃敌	Diphenamid
草萘胺	Napropamide
补体3	complement 3
补体4	complement 4
补加乐	progynova
补佳乐	estradiol valerate
卟啉锰	manganese porphyrin
卟啉铁	ferric protoporphyrin
薄荷烯	menthene
薄荷油	pennyroyal
菜豆酸	phaseic acid
布洛芬	ibuprofen
不锈钢	stainless steel
布黎醇	bulnesos
布藜醇	bulnesol
布藜烯	Alpha-bulnesene
胆绿素	biliverdin
胆红素	bilirubin
胆红质	bilirubin
胆固醇	cholesterol
单质硫	sulfur
单宁酶	tannase
单宁酸	tannic acid
单氰氨	hydrogen cyanamide
单氰胺	cyanamide
单态氧	monomorphism oxygen
单晶硅	silicon, crystalline
单甲脒	formamidine
丹宁酸	tannic acid
丹皮酚	paeonol
丹那唑	danazol
丹酚酸	salvianolic acid
丹酰氯	dansyl chloride
丹曲林	dantrolene
单甘脂	glycerol monostearate
单甘酯	monoglyceride
单硅烷	monosilane
丹参醛	tanshinaldehyde
丹参素	Danshensu
丹参酮	tanshinone
丹参酸	salvianolic acid
大麻素	Anandamide
大黄酸	rhein
大戟醇	euphol
大马酮	damascenone
大蒜素	allicin
代森铵	amobam
代森联	metiram
代森锰	maneb
代森锌	zebtox
大黄酚	chrysophanol
大黄苷	rheochrysin
大黄素	emodin
哒嗪酮	pyridazinone
达旦黄	Thiazol Yellow
达菲林	diphereline
达肝素	dalteparin
达必佳	triptorelin
达克罗	dacromet
达利珠	daclizumab
达那唑	danazol
大豆苷	daidzin
大豆甙	daidzin
大豆素	daidzein
醋酉翁	3-hydroxybutanone
催产素	oxytocin
催化剂	catalysts
醋酸酯	acetate
催乳素	prolactin
存活素	Proteinase inhibitor, survivin
寸拜醇	thunbergol
哒螨灵	pyridaben
哒螨酮	pyridaben
醋酸锌	zinc acetate
醋酸盐	acetate
醋酸钇	yttrium acetate
醋酸镱	ytterbium acetate
醋酸铟	Indium acetate
醋酸银	silver acetate
醋酸铝	aluminium acetate
醋酸氯	chlorhexidine
醋酸钠	sodium acetate
醋酸镍	nickel acetate
醋酸镁	magnesium acetate
醋酸锰	manganese acetate
醋酸铅	lead acetate
醋酸锶	strontium acetate
醋酸锑	antimony acetate
醋酸铁	iron acetate
醋酸铜	copper acetate
醋酸铈	cerium acetate
醋酸铵	ammonium acetate
醋酸钡	barium acetate
醋酸钯	palladium acetate
醋氨酚	acetamidophenol
醋酸镉	cadmium acetate
醋酸铬	chromium acetate
醋酸根	acetate
醋酸钴	cobalt acetate
醋酸钙	calcium acetate
醋酸酐	acetic anhydride
醋酸钾	potassium acetate
醋酸锂	lithium acetate
粗淀粉	starch, crude
枞油烯	sylvestrene
促红素	erythropoietin
促乳素	prolactin
次氯酸	hypochlorous acid
次溴酸	hypobromous acid
雌酚酮	estrone
刺柏脑	juniper camphor
刺柏烯	junipene
刺伯烯	junipene
刺参酮	oplopanone
刺槐苷	acaciin
刺槐素	acacetin
刺囊酸	echinocyctic acid
刺桐碱	hypaphorine
雌马酚	equol
雌三醇	estriol
次卟啉	deuteroporphyrin
次黄苷	inosine
次磷酸	hypophosphorous acid
雌激素	estrogen
雌二醇	estradiol
绰奇烷	trachylobane
磁铁矿	Magnetite
磁性铁	ferroferric oxide
醇羟基	alphatic hydroxyl
纯净水	water
纯啡肽	prodynorphin
醇勃龙	trenbolone
喘乐宁	ventolin
串珠素	Perlecan
穿琥宁	potassium dehydroandrographolide succinate
穿孔素	perforin
川楝素	toosendanin
川皮苷	nobiletin
川穹嗪	tetramethylprazine
川芎酚	chuanxiongol
川芎嗪	ligustrazine
川芎素	sodium ferulate
蛋白C	Blood-coagulation factor XIV
蛋白氮	protein nitrogen
蛋白胨	peptone
胆酸钠	sodium cholate
胆石酸	lithocholic acid
胆甾醇	cholesterol
胆甾烷	cholestane
胆汁酸	bile acid
弹力酶	elastase
蛋氨醇	methionol
蛋氨酸	methionine
氮离子	nitrogen, ions
氮化锆	zirconium nitride
氮化铬	chromium nitride
氮化硅	silicon nitride
氮化镓	Gallium nitride
氮化铝	aluminum nitride
氮化锰	manganese nitride
氮化钼	molybdenum nitride
氮化钠	sodium azide
氮化硼	boron nitride
氮化钛	titanium nitride
氮化铁	iron nitride
氮代谢	nitrogen, metabolism
氮化钒	vanadium nitride
蛋硫醛	methional
蛋白糖	aspartame
蛋白质	protein
蛋白酶	protease
敌草胺	napropamide
敌草腈	dichlobenil
敌草净	desmetryn
敌草快	diquat
敌草隆	diuron
敌草索	chlorthal-dimethyl
敌敌畏	dichlorvos
敌噁磷	dioxathion
敌恶磷	dioxation
敌磺钠	fenaminosulf
敌菌丹	captafol
敌菌灵	anilazine
敌克松	fenaminosulf
敌力脱	propiconazole
敌杀死	deltamethrin
敌鼠钠	sodium diphacinone
抵抗素	resistin
地安磷	mephosfolan
狄氏剂	diazinon
狄试剂	Dieldrin
敌百虫	trichlorfon
敌瘟磷	edifenphos
地巴唑	dibazol
地虫磷	fonophos
地蒽酚	anthralin
地氟醚	desflurane
地氟烷	desflurane
地高辛	Digoxin
地黄苷	martynoside
地开石	dickite
地乐酚	dinoseb
地茂散	chloroneb
地西泮	diazepam
德克隆	dechlorane plus
等位酶	Allozyme
低氘水	deuterium-depleted water
低聚糖	oligose
低碳钢	Steel, low carbon
滴滴滴	rhothane
滴滴涕	chlorophenothane
滴滴伊	dichlorodiphenyldichloroethylene
刀豆素	concanavalin A
稻丰散	phenthoate
稻瘟灵	isoprothiolane
得宝松	diprospan
当归醇	angelol B
氮元素	Nitrogen, atomic
氮原子	nitrogen, atom
氮平衡	nitrogen, balance
当药苷	sweroside
丁噻隆	tebuthiuron
丁酸酐	butyric anhydride
丁酸根	butyrate
丁卡因	dicaine
丁内酯	butyrolactone
丁醚脲	diafenthiuron
丁脲胺	bumetanide
丁硫堇	buthionine sulfoximine
丁基锂	butyllithium
丁基锡	butyltin
丁黄药	butyl xanthate
丁二烯	butadiene
丁二酮	butanedione
丁基苯	benzene, butyl-
丁二胺	putrescine
丁二醇	butanediol
丁草胺	butachlor
丁草特	butylate
丁虫腈	flufiprole
丁二腈	butanedinitrile
丁二醛	succinaldehyde
丁二酸	succinic acid
丁胺磷	butamifos
丁苯酚	butyphthalide
丁苯酞	butyl phthalide
叠氮钠	sodium azide
叠氮酸	Hydrazoic acid
叠氮糖	glycosyltriazole
凋亡素	apoptin
靛氰绿	indocyanine green
靛玉红	indirubin
吊白块	sodium bisulfoxylate formaldehyde
钓樟醇	linderol
调吡脲	forchlorfenuron
靛基质	indole
跌打丸	Dieda pills
靛酚蓝	indophenol blue
淀粉浆	starch
淀粉酶	amylase
滇乌碱	yunaconitine
淀粉糊	starch
电气石	tourmaline
碘乙醇	iodoethanol
碘乙酸	iodoacetic acid
碘乙烷	iodoethane
碘缺乏	iodine, biological studies, deficiency
碘酸钙	calcium iodooate
碘酸根	iodate
碘酸钾	potassium iodate
碘酸钠	Sodium iodate
碘酸盐	iodate
碘化铵	ammonium iodide
碘甲烷	iodomethane
碘离子	iodine ion
碘硫磷	iodofenphos
碘帕醇	iopamidol
碘化铝	aluminum iodide
碘化钠	sodium iodide
碘化铅	lead iodide
碘化氢	hydrogen iodide
碘化铜	cupric iodide
碘化物	iodide
碘化锌	zinc iodide
碘化镉	cadmium iodide
碘化汞	Mercury iodide
碘化钾	potassium iodide
碘化铑	rhodium iodide
碘化锂	lithium iodide
碘化铟	indium iodide
碘化银	silver iodide
碘化油	lipiodol
碘比醇	iobitridol
碘必乐	iopamidol
碘丙烷	iodopropane
碘代苯	iodobenzene
地佐辛	dezocine
蒂巴因	thebaine
碘甘油	iodine glycerin
碘海醇	iohexol
碘佛醇	ioversol
碲化铋	bismuth telluride
碲化镉	cadmium telluride
碲化铬	cadmium telluride
碲化铅	lead telluride
碲化物	telluride
地散磷	bensulide
地亚农	diazinon
地衣酚	5-methyl-1,3-benzenediol
对苯醌	p-benzoquinone
杜香醇	ledol
杜仲醇	eucommiol
杜松醇	cadinol
杜松脑	juniper camphor
杜松烯	cadinene
度米芬	domiphen
端粒酶	telomerase
毒鼠强	tetramine
毒莠定	picloram
毒死碑	cyhalothrin
毒死婢	chlorpyrifos
毒死蜱	chlorpyrifos
杜鹃素	farrerol
杜鹃酮	germacrone
杜冷丁	dolantin
独居石	monazite
豆磷脂	Soybean phospholipid
豆甾醇	stigmasterol
豆甾烷	stigmastane
毒草胺	propachlor
毒虫畏	chlorfenvinphos
毒藜碱	anabasine
毒杀芬	toxaphene
丁烯醛	crotonaldehyde
丁烯酸	butenoic acid
丁酰肼	daminozide
丁酰氯	butyryl chloride
丁烯醇	3-butene-l-ol
丁香醇	caryophyllene alcohol
丁香酚	eugenol
丁烯酮	methyl vinyl ketone
丁香苷	syringin
丁香醛	syringaldehyde
丁酮威	butocarboxim
丁酮肟	diacetylmonoxime
丁酸钠	sodium butyrate
丁酯磷	butonate
啶虫隆	chlorfluazuron
啶虫咪	acetamiprid
啶虫脒	acetamiprid
啶虫眯	Acetamiprid
丁香酸	syringic acid
丁香烯	caryophyllene
丁辛醇	butyl alcohol mixed with 2-ethyl hexanol
顶体酶	proteinase, acrosomal
定虫隆	chlorfluazuron
豆固醇	stigmasterol
豆磺隆	chlorimuron-ethyl
豆寇酸	myristic acid
豆蔻醇	myristyl alcohol
豆蔻明	cardamomin
豆蔻酸	myristic acid
对甲苯	p-toluene
对甲酚	p-methylphenol
对硫磷	parathion
对氯酚	parachlorophenol
对孟烷	menthane
对孟烯	p-menthene
对位红	para red
对氧磷	paraoxon
[truncated: 35,848 more rows]

## Sheet: Data_EN2CH
Source Name	Target Name
Se	晒
gum	树胶
tin	锡
fat	脂肪
Val	颉氨酸
zinc	锌
MBOA	门布
urea	尿素
talc	滑石粉
dopa	多巴
agar	琼脂
heme	血红素
1-ol	1-醇
ZnSe	硒化锌
Span	司班
acid	酸
alum	明矾
iron	铁
lead	铅
NiCr	铬化镍
Pd/C	钯炭
mica	云母
gold	金
lime	石灰
MELE	美林洛尔
neon	氖
MCPA	二甲四氯
musk	麝香
stem	茎
orcin	苔黑酚
naled	二溴磷
hemin	氯化血红素
butin	紫铆素
lyase	裂解酶
steel	钢
water	水
brass	黄铜
renin	肾素
morin	桑色素
sugar	糖
Trion	钛铁试剂
xenon	氙
human	人
Sofit	扫茀特
vapor	蒸汽
vinyl	乙烯基
ledol	喇叭茶醇
Rnase	RNA酶
Topik	顶尖
Dnase	DNA酶
sudan	苏丹色素
Pyran	吡喃
bixin	胭脂树橙
apiin	芹菜苷
Lysol	来苏儿
yeast	酵母
penem	青霉烯
boron	硼
mirex	灭蚁灵
urate	尿酸盐
imine	亚胺
doxal	多虑平
equol	雌马酚
rosin	松香
topaz	黄玉
brine	盐水
aloin	芦荟苷
cetol	鲸蜡醇
radon	氡
apiol	芹菜脑
cutin	角质
irone	鸢尾酮
mepem	美平
nerol	橙花醇
xylan	木聚糖
furil	糠偶酰
rhein	大黄酸
argon	氩气
lipid	脂
Lyral	新铃兰醛
furan	呋喃
borax	硼砂
Nordy	诺帝
Tuzet	退菌特
oleum	发烟硫酸
maneb	代森锰
escin	七叶皂甙
humin	胡敏素
imide	酰亚胺
Nisin	乳链菌肽
akton	硫虫畏
nopol	诺卜醇
Cocal	可卡醛
neral	橙花醛
urine	尿
resin	树脂
ethal	十六烷醇
sarin	沙林
ricin	蓖麻毒素
TAXOL	泰素
tween	吐温
mesna	美司钠
ionol	紫罗兰醇
amide	酰胺
rutin	芦丁
Azone	氮酮
losec	洛赛克
glass	玻璃
Dwell	氯唑灵
ozone	臭氧
ziram	福美锌
nylon	尼龙
soman	梭曼
amine	胺
uvaol	熊果醇
algin	褐藻胶
eosin	伊红
ureide	酰脲
Mn-Met	蛋氨酸锰
quartz	石英
rennet	皱胃酶
methyl	甲基
carvol	香草酮
albite	钠长石
Cesium	铯
decane	癸烷
pyrone	吡喃酮
alliin	蒜氨酸
butine	丁炔
glycol	甘醇
Yasmin	优思明
benzil	苯偶酰
ethoxy	乙氧基
coixan	薏苡仁多糖
biuret	缩二脲
casein	干酪素
Livial	利维爱
phytin	菲汀
silver	银
marein	马里苷
sphene	榍石
sugiol	柳衫酚
cyadox	喹赛多
Evodin	吴茱萸内酯
ergine	麦角酰胺
oxygen	氧
serine	丝氨酸
tannin	单宁
thymol	麝香草酚
Octane	辛烷
adprin	阿德呋啉
bifico	培菲康
cobalt	钴
musk T	麝香T
octoil	辛基油
Ruidai	瑞代
acetol	丙酮醇
DIMBOA	丁布
diuron	敌草隆
butein	紫铆花素
helium	氦
purine	嘌呤
Aimiao	爱苗
copper	铜
ethion	乙硫磷
urease	脲酶
pinane	蒎烷
Cerium	铈
enzyme	酶
aldrin	艾氏剂
Biogen	生命素
captan	克菌丹
Ekonol	聚苯酯
olefin	烯烃
valone	异杀鼠酮
olivil	橄榄脂素
lupeol	羽扇豆醇
malate	苹果酸盐
mannan	甘露聚糖
avidin	亲和素
biotin	生物素
Cimzia	赛妥珠单抗
talose	塔罗糖
Kathon	卡松
ambrox	降龙涎香醚
diquat	敌草快
hexose	己糖
ionone	紫罗兰酮
hexene	己烯
phoxim	辛硫磷
pyrene	芘
hopane	藿烷
fuscin	暗褐菌素
guaiol	愈创木醇
unasyn	优立新
indigo	靛蓝
lilial	铃兰醛
decene	癸烯
ligase	连接酶
pratol	车轴草醇
pyrite	硫铁矿
thujol	侧柏醇
orexin	食欲素
lipase	脂肪酶
zeatin	玉米素
borane	硼烷
chitin	甲壳素
nonane	壬烷
amyrin	香树素
barium	钡
durene	杜烯
gypsum	石膏
indium	铟
red 2G	红色2G
annite	铁云母
atolin	液体石蜡
halite	岩盐
borate	硼酸盐
emodin	大黄素
allose	阿洛糖
carane	蒈烷
lyxose	来苏糖
euphol	大戟醇
lysine	赖氨酸
Xeloda	希罗达
Ecabet	依卡倍特
aurone	橙酮
carene	蒈烯
fustin	黄颜木素
abrine	相思子碱
aether	乙醚
ajoene	阿藿烯
sterol	甾醇
lectin	凝集素
stenol	石烯醇
ayapin	泽兰内酯
Lifein	力尔凡
primer	引物
iodate	碘酸根
Cetene	鲸腊烯
abitol	氢化枞醇
indene	茚
amobam	代森铵
ketene	乙烯酮
zircon	锆英石
butane	丁烷
sulfur	硫
indane	二氢化茚
iodine	碘
kakuol	卡枯醇
elemol	榄香醇
augite	普通辉石
bursin	三肽囊素
cresol	甲酚
gyrase	螺旋酶
papain	木瓜蛋白酶
pinene	蒎烯
climen	克龄蒙
Rompum	隆朋
mogrol	罗汉果醇
evodol	吴茱萸内酯醇
fucose	岩藻糖
maltol	麦芽酚
picein	云杉素
ketone	酮
statin	他汀类
acetyl	乙酰
phytol	植醇
thiram	福美双
ombuin	商陆素
imidan	亚胺硫磷
lonone	紫罗酮
silane	甲硅烷
furoin	糠偶姻
marmin	马尔敏
panose	潘糖
orobol	香豌豆酚
edulan	依杜兰
zebtox	代森锌
aramid	芳酰胺
carbon	碳
dodine	多果定
erbium	铒
pectin	果胶
Ononin	芒柄花苷
manool	泪杉醇
oxamyl	杀线威
starch	淀粉
uracil	尿嘧啶
folpet	灭菌丹
acetal	乙缩醛
calone	海酮
endrin	异狄氏剂
Irisin	鸢尾素
lignin	木质素
pepsin	胃蛋白酶
tricin	苜蓿素
artane	安坦
cymene	伞花烃
heroin	海洛因
inulin	菊粉
kinase	激酶
nativo	拿敌稳
arsine	砷化氢
fraxin	秦皮素苷
glycan	聚糖
Amaryl	亚莫利
Tienam	泰能
octene	辛烯
iodide	碘化物
lutein	叶黄素
bronze	青铜
citral	柠檬醛
hexane	己烷
ethane	乙烷
azur A	天青A
Mn-Gly	甘氨酸锰
iridin	野鸢尾苷
isatin	靛红
leptin	瘦素
osthol	蛇床子素
aescin	七叶皂苷
alocin	苯咪唑青霉素
amylin	胰淀素
cedrol	雪松醇
xylose	木糖
Dioxin	二噁英
smecta	思密达
nickel	镍
Proton	质子
asulam	磺草灵
biurea	联二脲
cartap	杀螟丹
cozaar	科素亚
ginnol	白果醇
piceid	白藜芦醇糖苷
xylene	二甲苯
ledene	喇叭烯
garnet	石榴石
prunin	普鲁宁
retene	惹烯
silica	硅溶胶
Crocin	藏红花素
Dacron	涤纶
phenol	苯酚
taxane	紫杉烷
valine	缬氨酸
radium	镭
ribose	核糖
indole	吲哚
lignan	木脂素
ebosin	依博素
ionene	紫罗烯
uranyl	铀酰
sodium	钠
avicel	结晶纤维素
bromide	溴化物
doxepin	多塞平
estrone	雌酮
Sijunzi	四君子汤
RNase A	RNA酶A
span-40	司盘-40
lilacol	紫丁香酚
glyoxal	乙二醛
monuron	灭草隆
dioxane	二氧六环
D-dimer	D-二聚体
benzene	苯
camphor	樟脑
chymase	糜酶
Luminal	鲁米那钠
kirenol	奇壬醇
laccase	漆酶
leucine	亮氨酸
geosmin	土臭素
red dye	染料红
sabinol	桧醇
SonoVue	声诺维
steviol	甜菊醇
taurine	牛磺酸
phytase	植酸酶
olestra	蔗糖聚酯
Kasumin	加瑞农
hexenol	己烯醇
koumine	钩吻素子
krypton	氪
benzoin	安息香
cedrene	雪松烯
choline	胆碱
cyanide	氰化物
diludin	二氢吡啶
ferrite	铁素体
fasudil	法舒地尔
acaciin	刺槐苷
baycard	巴沙
pulegol	长叶薄荷醇
uricase	尿酸酶
ribitol	核糖醇
rosavin	络萨维
oxirane	氧杂环丙烷
pp'-DDE	PP'-滴滴伊
pp'-DDT	pp'-滴滴涕
Pronase	链霉蛋白酶
lupenol	扇豆醇
menthol	薄荷脑
nepetin	泽兰黄酮
famesol	法尼醇
gramine	芦竹碱
dazomet	棉隆
allitol	蒜糖醇
citrate	柠檬酸盐
cystine	胱氨酸
dextran	葡聚糖
dicaine	丁卡因
estriol	雌三醇
agarase	琼胶酶
quinine	奎宁
guaiene	愈创木烯
hinesol	茅术醇
lactose	乳糖
unknown	未知
enolase	烯醇化酶
Gleevec	格列卫
hyperin	金丝桃苷
insulin	胰岛素
cadmium	镉
argilla	陶土
arsenic	砷
decanol	癸醇
propham	苯胺灵
matrine	苦参碱
aucubin	桃叶珊瑚苷
asarone	细辛脑
dicofol	三氯杀螨醇
ferrate	高铁酸盐
peimine	贝母素甲
realgar	雄黄
iridium	铱
juglone	胡桃醌
octenal	辛烯醛
oftanol	异丙胺磷
sesamin	芝麻素
Zenapax	赛尼哌
alcohol	酒精度
ethanol	乙醇
acetoin	乙偶姻
hafnium	铪
cadinol	杜松醇
betagan	贝他根
bonopol	溴硝醇
narasin	那拉霉素
sotalol	索他洛尔
tylosin	泰乐菌素
aniline	苯胺
carvene	香芹烯
lactone	内酯
Span 20	司盘20
tacrine	他克林
thorite	钍石
Zoletil	舒泰
furanol	菠萝酮
demeton	内吸磷
activin	激活素
carveol	香芹醇
chinone	醌
aconine	乌头原碱
nitrite	亚硝酸盐
lactase	乳糖酶
laminin	层粘连蛋白
oxamide	草酰胺
trypsin	胰蛋白酶
Zoladex	诺雷德
β-nerol	β-柠檬醇
cubebol	荜澄茄油烯醇
benomyl	苯菌灵
caramel	焦糖色素
acetate	醋酸根
span-60	司盘-60
op'-DDT	OP'-滴滴涕
maltase	麦芽糖酶
tyrosol	酪醇
iridoid	环烯醚萜
muscone	麝香酮
α-ionol	α-紫罗兰醇
phorbal	佛波醇
scoline	琥珀胆碱
Fosamax	福善美
curdlan	可得然胶
butanal	正丁醛
betulin	白桦酯醇
heptene	庚烯
holmium	钬
esculin	七叶苷
aplysin	海兔素
anisole	苯甲醚
baipuli	百普力
chloral	三氯乙醛
Span-80	司盘-80
taspine	塔斯品碱
RH-5849	抑食肼
linarin	蒙花苷
pentane	戊烷
nephrin	肾升压素
eosin B	曙红B
kyanite	蓝晶石
salicin	水杨苷
saponin	皂苷
Span-20	司盘-20
Sudan G	苏丹红G
Sudan I	苏丹红I
thulium	铥
vitamin	维生素
agarose	琼脂糖
Cantide	癌泰得
Esmeron	爱可松
emulsin	苦杏仁酶
Fendona	奋斗呐
flavone	黄酮
creosol	木焦油醇
bufalin	蟾蜍灵
cineole	桉叶油素
tritium	氚
retinal	维生素A醛
sulfite	亚硫酸盐
niobium	铌
ouabain	哇巴因
inosine	肌苷
Avastin	阿瓦斯汀
Melonal	甜瓜醛
harmine	去氢骆驼蓬碱
lindane	林丹
Sapylin	沙培林
stearol	硬脂醇
thujene	崖柏烯
leucite	白榴石
gastrin	胃泌素
nonenal	壬烯醛
bixafen	联苯吡菌胺
DNase I	DNA核酸酶I
fenchol	小茴香醇
xylitol	木糖醇
ynamide	炔酰胺
octanal	辛醛
goitrin	致甲状腺肿素
horizon	好克力
Digoxin	地高辛
trienol	三烯甘油酯
yttrium	钇
irilone	德鸢尾苷元
nitrone	硝酮
rimuene	芮木泪柏烯
afzelin	阿福豆苷
betaine	甜菜碱
biochar	生物炭
cocaine	可卡因
dalapon	茅草枯
fibrate	贝特
hexitol	己六醇
peregal	平平加
famphur	伐灭磷
flazine	酒渣碱
erepsin	肠蛋白酶
asphalt	沥青
bauxite	铝土矿
corylin	补骨脂宁
cubenol	库贝醇
amylase	淀粉酶
neamine	新霉胺
nepodin	酸模素
nonanol	壬醇
octenol	辛烯醇
galanin	甘丙肽
hexenal	己烯醛
sulfate	硫酸根
xylenol	二酚
borneol	冰片
cuprite	赤铜矿
euparin	泽兰素
aspisol	赖氨匹林
diamide	联氨
Yijunte	抑菌特
cuminal	枯茗醛
danazol	达那唑
benzyne	苯炔
Amistar	阿米西达
ammonia	氨
omentin	网膜素
osalmid	柳胺酚
phytane	植烷
Vitavax	卫福
aspirin	阿司匹林
amylose	直链淀粉
icariin	淫羊藿苷
neotame	纽甜
retinol	视黄醇
Simponi	戈利木单抗
S-RNase	S-核酸酶
arbutin	熊果苷
Ecstasy	摇头丸
esmolol	艾司洛尔
amitraz	双甲脒
dapsone	氨苯砜
diazine	二嗪
bromine	溴
brucine	马钱子碱
lactate	乳酸盐
lanceol	澳白檀醇
larnite	斜硅钙石
morusin	桑根皮素
oxozole	恶唑
pp'-DDD	pp'-滴滴滴
rivanol	利凡诺
Span 60	司盘60
vitexin	牡荆素
mullite	莫来石
Span 85	司盘85
hexanal	己醛
fenuron	非草隆
glucose	葡萄糖
dioscin	薯蓣皂苷
Ebselen	依布硒啉
cumenol	对异丙基苄醇
decanal	癸醛
carbony	羰基
azulene	甘菊环
Brij-35	聚氧乙烯月桂醚
daphnin	瑞香苷
endoxin	内洋地黄素
alginas	褐藻酸酶
Span 80	司盘80
phytone	植酮
pyrolin	鹿蹄草素
toluene	甲苯
β-ionol	β-紫罗兰醇
luminol	鲁米诺
phorate	甲拌磷
gelatin	明胶
bismuth	铋
ginaton	金纳多
inhibin	抑制素
motilin	胃动素
naphtha	石油脑
sucrose	蔗糖
pyrrole	吡咯
bromate	溴酸盐
cyanate	氰酸根
nomilin	诺米林
oxalene	草烯
siduron	环草隆
thujane	侧柏烷
hydride	氢化物
Kaurene	贝壳衫烯
peptone	蛋白胨
carmine	胭脂红
calcium	钙
aramite	杀螨特
allicin	大蒜素
curzate	杜邦克露
dispase	分散酶
butanol	丁醇
alanine	丙氨酸
diosmin	地奥司明
diamond	金刚石
Span 40	司盘40
thujone	侧柏酮
obtusin	决明素
dinoseb	地乐酚
elixene	甘香烯
kestose	蔗果三糖
lithium	锂
maltose	麦芽糖
hexanol	己醇
emerald	祖母绿
apigene	芜花素
arctiin	牛蒡子苷
carvone	香芹酮
safrole	黄樟素
timolol	噻吗洛尔
gahnite	锌尖晶石
nimotop	尼膜同
nitrate	硝酸盐
propyne	丙炔
ptyalin	唾液淀粉酶
zymosan	酵母聚糖
filipin	非律平
apyrase	腺苷双磷酸酶
calpain	钙蛋白酶
cedrone	柏木酮
effusol	厄弗酚
fonofos	地虫硫磷
guanine	鸟嘌呤
thymine	胸腺嘧啶
β-neral	β-橙花醛
sucrase	蔗糖酶
aglycon	苷元
altrose	阿卓糖
Chrysin	白杨素
heptane	庚烷
uranium	铀
nonanal	壬醛
pentene	戊烯
Loganin	马钱苷
henryin	鄂西香茶菜素
mercury	汞
methane	甲烷
genipin	京尼平
eugenol	丁香酚
alloxan	四氧嘧啶
alunite	明矾石
lipoxin	脂氧素
Madopar	美多芭
martite	假象赤铁矿
hirudin	水蛭素
hormone	性激素
tegafur	替加氟
germine	计明碱
heparin	肝素
formate	甲酸盐
proline	脯氨酸
protein	蛋白质
rhodium	铑
Roundup	农达
Isodrin	异艾氏剂
MGK-264	增效胺
steroid	类固醇
wogonin	汉黄芩素
zeolite	沸石
copaene	古巴烯
dextrin	糊精
alitame	阿力甜
Calsurf	珂立苏
cavonyl	环巴比妥
fisetin	漆黄素
dickite	地开石
cosmene	波斯菊萜
biomass	生物量
limonin	柠檬苦素
pentose	戊糖
sulfide	硫化物
skatole	粪臭素
rhenium	铼
bifenox	甲羧除草醚
calcite	方解石
adenine	腺嘌呤
mannose	甘露糖
Protium	氕
suramin	苏拉明
oxazole	噁唑
suberin	木栓质
codeine	可待因
curlone	姜黄新酮
callose	胼胝质
asomate	福美胂
atraton	莠去通
adipsin	脂肪细胞素
ambylan	阿泊拉霉素
amidase	酰胺酶
embelin	蒽贝素
daidzin	大豆苷
brucite	水镁石
pinacol	频哪醇
Pegasys	派罗欣
Zeranol	折仑诺
taxusin	紫杉素
TNP-470	烟曲霉醇
skimmin	茵芋苷
cubebin	荜澄茄苦素
actarit	阿克他利
ametryn	莠灭净
zoalene	二硝托胺
fructan	果聚糖
octanol	辛醇
calcein	钙黄绿素
carotol	胡萝卜次醇
cynarin	洋蓟素
lenacil	环草啶
ectoine	四氢嘧啶
melanin	黑色素
nystose	蔗果四糖
relaxin	松弛素
helicid	豆腐果苷
analgin	安乃近
azurite	蓝铜矿
bainite	贝氏体
silybin	水飞蓟宾
terbium	铽
terpane	萜烷
phytene	植烯
paeonol	丹皮酚
patulin	棒曲霉素
peptide	肽
nylon-6	尼龙-6
lactide	丙交酯
dibazol	地巴唑
didymin	香风草甙
glycine	甘氨酸
kinetin	激动素
tuftsin	吞噬肽
Onychin	金粉蕨素
novolin	诺和灵
neoline	尼奥灵
new red	新红
probe 1	探针1
lipitor	立普妥
metiram	代森联
eudesma	桉叶双烯
alismol	泽泻醇
apoptin	凋亡素
boronal	包罗醛
tannase	单宁酶
tazocin	特治星
valeral	缬草醛
myrcene	月桂烯
linalol	芫荽醇
linuron	利谷隆
neutron	中子
propane	丙烷
osthole	王草素
oxamate	草氨酸盐
lupeone	羽扇豆酮
jadeite	翡翠
kefiran	开菲尔多糖
laurate	月桂酸酯
gitoxin	羟基洋地黄毒苷
decorin	核心蛋白聚糖
elemene	榄香烯
evertal	艾薇醛
arbidol	阿比朵尔
Botulin	肉毒毒素
dicamba	麦草畏
eosin Y	曙红Y
oxidase	氧化酶
betaloc	倍他乐克
gallium	镓
acetone	丙酮
uridine	尿苷
humulon	葎草酮
carbide	碳化物
cyclene	环烯
intimin	志贺毒素
nitrile	腈
ocimene	罗勒烯
oligose	低聚糖
styrene	苯乙烯
ghrelin	胃促生长素
plasmin	纤溶酶
brassin	芸苔素
aglycin	胰胺肽
stannum	焊锡
trillin	延龄草苷
MCPA-Na	2甲4氯钠
ozagrel	奥扎格雷
detemir	特地胰岛素
haydite	陶粒
Caspase	半胱氨酸蛋白酶
apatite	磷灰石
avandia	文迪雅
erianin	毛兰素
fosetyl	三乙膦铝
albumin	白蛋白
iohexol	碘海醇
sorbite	索氏体
Statins	舒降之
thorium	钍
thymene	百里香烯
sesamol	芝麻酚
silicon	硅
oxalate	草酸根
lemonol	柠檬醇
Jasmone	茉莉酮
widdrol	韦得醇
zierone	桔利酮
sportak	施保克
chlorin	二氢卟吩
chlorine	氯
casticin	紫花牡荆素
cefaclor	头孢克洛
astilbin	落新妇苷
ethanone	乙酮
fuchsite	铬云母
galectin	半乳凝素
tetralin	四氢化萘
xanthate	黄药
viologen	紫精
α-amyrin	α-香树脂醇
kitazine	异稻瘟净
hepcidin	铁调素
lead ion	铅离子
L-serine	L-丝氨酸
lycorine	石蒜碱
morphine	吗啡
mecarbam	灭蚜磷
oxindole	氧化吲哚
titanium	钛
Tween-80	吐温-80
urushiol	漆酚
β-costol	β-木香醇
guar gum	瓜尔豆胶
monazite	独居石
Nile red	尼罗红
prazosin	哌唑嗪
ramipril	雷米普利
amrinone	氨力农
acridine	吖啶
2-octane	2-辛烷
fuchsine	品红
eudesmin	桉脂素
endostar	恩度
domiphen	度米芬
D-xylose	D-木糖
catalpol	梓醇
Bayrepel	羟哌酯
azo ruby	偶氮红玉
atrazine	莠去津
cefminox	头孢米诺
caprylin	辛酸甘油酯
chlorate	氯酸盐
colipase	辅脂肪酶
eicosene	二十碳烯
Orexin A	食欲素A
prunetin	樱黄素
mollugin	大叶茜草素
laponite	锂藻土
thiourea	硫脲
zilanine	紫蓝素
β-carene	β-蒈烯
arabitol	阿拉伯糖醇
carboxyl	羧基
cinnabar	辰砂
cuparene	花侧柏烯
E-citral	E-柠檬醛
flunixin	氟尼辛
Perthite	长石
pregnane	孕甾烷
motilium	吗丁啉
muscimol	蝇蕈醇
idazoxan	咪唑克生
villosol	白花败酱醇
vectibix	帕尼单抗
Sudan II	苏丹红II
n-butene	正丁烯
naloxone	纳洛酮
imazalil	抑霉唑
integrin	整合素
tantalum	钽
xylanase	木聚糖酶
daidzein	大豆苷元
D-biotin	D-生物素
chemerin	趋化素
chloride	氯化物
Brazilin	巴西苏木素
brushite	透钙磷石
glycerol	甘油
ginsenol	人参新萜醇
dialifos	氯亚胺硫磷
enoxacin	依诺沙星
sabinene	桧烯
sclareol	香紫苏醇
SYP-3759	氟菌螨酯
p-cresol	对甲苯酚
L-lysine	L-赖氨酸
marmesin	异紫花前胡苷元
ammelide	三聚氰酸一酰胺
ankerite	铁白云石
antimony	锑
3-octene	3-辛烯
glutinol	粘霉烯醇
ketamine	氯胺酮
edulan I	依杜兰I
dahllite	碳酸磷灰石
omipaque	欧乃派克
para red	对位红
paraquat	百草枯
scandium	钪
hetisine	异叶乌头素
malaoxon	马拉氧磷
mazindol	马吲哚
m-cymene	间伞花烃
α-pinene	α-蒎烯
squalene	角鲨烯
eudesmol	桉叶油醇
dodecane	十二烷
coriatin	马桑亭
davercin	环脂红霉素
brivanib	布立尼布
chromium	铬
2-octyne	2-辛炔
estrogen	雌激素
Glutenin	麦谷蛋白
glycogen	糖原
butralin	止芽素
atenolol	阿替洛尔
ceramide	神经酰胺
chromate	铬酸根
crocetin	西红花酸
lycopene	番茄红素
p,p'-DDE	4,4'-滴滴伊
smectite	蒙皂石
seretide	舒利迭
vanadate	钒酸盐
myosmine	麦斯明
oroxin B	木蝴蝶苷B
carene-4	蒈烯-4
citrinin	桔霉素
diacetin	二乙酸甘油酯
2-hexyne	2-己炔
euxenite	黑稀金矿
formazan	甲臜
cubanite	方黄铜矿
diacetyl	双乙酰
diazinon	二嗪磷
bromelin	菠萝蛋白酶
cefdinir	头孢地尼
1-octyne	1-辛炔
L-fucose	L-岩藻糖
lentinan	香菇多糖
imatinib	伊马替尼
n-octane	正辛烷
nopinone	诺蒎酮
sinapine	芥子碱
p-xylene	对二甲苯
Tween 20	吐温20
tween 80	吐温80
troosite	托氏体
α-ionone	α-紫罗兰酮
β-citral	β-柠檬醛
β-cymene	β-聚伞花素
sulphone	砜
rubidate	茜草双酯
lecithin	卵磷脂
monensin	莫能菌素
propineb	丙森锌
propoxur	残杀威
dolomite	白云石
Fresubin	瑞素
butylene	丁烯
limonene	柠檬烯
o-cresol	邻甲酚
thymulin	血清胸腺因子
titanate	钛酸酯
Tween-20	吐温-20
alopaizi	阿罗蒎兹
alphagan	阿法根
biapenem	比阿培南
hydroxyl	羟基
edoxaban	依度沙班
ethephon	乙烯利
fenchone	小茴香酮
corianin	马桑宁
decursin	紫花前胡素
carbadox	卡巴氧
Pyranose	吡喃糖
spinosin	斯皮诺素
steapsin	胰脂肪酶
thebaine	蒂巴因
thiamine	硫胺素
thrombin	凝血酶
nylon-12	尼龙12
n-butane	正丁烷
neomycin	新霉素
vaterite	球霰石
vomicine	番木鳖次碱
wurtzite	钎锌矿
geraniin	老鹳草素
glucagon	胰高血糖素
LH-2010A	氟醚菌酰胺
ketone 9	酮9
calamine	炉甘石
bicyclol	双环醇
bufrudin	菲牛蛭素
anemonin	白头翁素
nitidine	两面针碱
meranzin	橘皮内酯
irigenin	野鸢尾苷元
veratrol	白藜芦素
β-myrene	b-月桂烯
β-pinene	β-蒎烯
shikonin	紫草素
sulindac	舒林酸
trifolin	三叶豆苷
tween-85	吐温-85
undecene	十一碳烯
Anonaine	番荔枝碱
acivicin	阿西维辛
arsenite	亚砷酸盐
calarene	白菖油萜
defensin	防御素
D-lysine	D-赖氨酸
Dieldrin	狄试剂
D-serine	D-丝氨酸
4-octene	4-辛烯
solanine	龙葵碱
terbufos	特丁硫磷
zolpidem	唑吡坦
Tween-40	吐温-40
undecane	十一烷
ocimenol	罗勒醇
premarin	倍美力
pristane	姥鲛烷
iron ion	Fe离子
lipase B	脂肪酶B
monascin	红曲素
anthrone	蒽酮
arctinal	牛蒡子醛
cytosine	胞嘧啶
fridelin	无羁萜酮
electron	电子
diketene	双乙烯酮
3-decyne	3-癸炔
aegirine	霓石
apixaban	阿哌沙班
biphenol	联苯二酚
boehmite	水铝石
butyrate	丁酸根
caudatin	告达亭
cecropin	家蚕抗菌肽
1-hexyne	1-己炔
2-pinene	2-蒎烯
verbenol	马鞭草烯醇
xylazine	噻拉嗪
resistin	抵抗素
Rifandin	利福定
struvite	鸟粪石
Z-citral	Z-柠檬醛
β-amyrin	β-香树脂醇
α-olefin	alpha-烯烃
olaparib	奥拉帕尼
nylon 66	尼龙66
ethylene	乙烯
glaucine	海罂粟碱
levodopa	左旋多巴
ligand 4	配体4
temephos	双硫磷
tyramine	酪胺
primer 1	引物1
picloram	毒莠定
Nifursol	硝呋索尔
mannitol	甘露醇
methylal	甲缩醛
naproxen	萘普生
imazapic	甲基咪草烟
arglabin	阿格拉宾
asarinin	细辛脂素
cembrene	西柏烯
bibenzyl	联苄
dezocine	地佐辛
diazepam	地西泮
Diborane	乙硼烷
spinosad	多杀菌素
torreyol	香榧醇
peonidin	芍药素
O-cymene	邻伞花烃
lysozyme	溶菌酶
Melittin	蜂毒素
miglitol	米格列醇
bentazon	苯达松
clobazam	氯巴占
charcoal	木炭
dopamine	多巴胺
D-ribose	D-核糖
Europium	铕
grifolan	灰树花多糖
bacdanol	印檀醇
cortisol	皮质醇
culmorin	大镰刀孢菌素
3-octyne	3-辛炔
solanone	茄酮
mimosine	含羞草碱
n-decene	正癸烯
linderol	钓樟醇
luteolin	木犀草素
macamide	玛咖酰胺
sea salt	海盐
prosuler	补骨内酯
simetryn	西草净
squalane	角鲨烷
sulfotep	治螟磷
primer 2	引物2
nonanone	壬酮
fargesin	辛夷脂素
fentanyl	芬太尼
heptanol	庚醇
granzyme	颗粒酶
glycidol	缩水甘油
diane-35	达英-35
axitinib	阿西替尼
bosentan	波生坦
carboxin	萎锈灵
cefixime	头孢克肟
comphene	樟烯
subtilin	枯草菌素
zaleplon	扎来普隆
marvelon	妈富隆
mepronil	灭锈胺
pediocin	乳酸片球菌素
alcalase	碱性蛋白酶
b-ionone	b-紫罗兰酮
corydine	紫堇定
butonate	丁酯磷
fluorite	荧石
furanone	呋喃酮
cysteine	半胱氨酸
2-carene	2-蒈烯
fonophos	地虫磷
Euthyrox	优甲乐
eldepryl	咪多吡
acacetin	金合欢素
a-pinene	a-蒎烯
atromide	安妥明
coumarin	香豆素
2-decyne	2-癸炔
mestinon	美斯替仑
glycitin	黄豆苷
lotensin	洛丁新
puerarin	葛根素
xanthine	黄嘌呤
rosmanol	迷迭香酚
δ-carene	δ-蒈烯
flobufen	氟罗布芬
Florisil	弗罗里硅土
cryptone	隐酮
anomalin	异白花前胡丁素
aldehyde	醛
vanadium	钒
xenotime	磷钇矿
α-carene	α-蒈烯
linalool	芳樟醇
Icotinib	埃克替尼
menthane	对孟烷
muramine	隐品巴马亭
orientin	荭草苷
polyoxin	多抗霉素
tolmetin	托美丁
saponite	皂石
lobeline	洛贝林
neferine	甲基莲心碱
n-valine	正缬氨酸
rhodopin	玫红品
fenfuram	甲呋酰胺
cubebene	荜澄茄烯
catechin	儿茶素
braunite	褐锰矿
bavachin	补骨脂甲素
camphane	莰烷
cefotiam	头孢替安
apatinib	阿帕替尼
ambroxol	氨溴索
Femoston	芬吗通
dodecone	十二酮
Colistin	黏菌素
1-butyne	乙基乙炔
propanal	正丙醛
palm oil	棕榈油
pentosan	戊聚糖
globulol	蓝桉醇
menthone	薄荷酮
tinplate	马口铁
tiamulin	泰妙菌素
triazole	三唑
pyrazole	吡唑
silicane	硅烷
silicone	硅酮
simetone	西玛通
pentanal	戊醛
phtylene	植物烯
protamex	复合蛋白酶
Lutetium	镥
nitrovin	硝呋烯腙
curcumin	姜黄素
alkaloid	生物碱
ammonium	铵
butyltin	丁基锡
farnesal	金合欢醛
malvidin	锦葵色素
sinigrin	烯丙基芥子油苷
Oridonin	冬凌草甲素
nitroxyl	亚硝酰氢
SYP-Z048	啶菌噁唑
tagatose	塔格糖
thiazole	噻唑
tramadol	曲马多
β-glucan	β-葡聚糖
fenbufen	芬布芬
bromofos	溴硫磷
carotane	胡萝卜烷
crocin-3	藏红花酸糖苷-3
cyclin E	细胞周期素E
cytidine	胞苷
D-allose	D-阿洛糖
albolene	白凡士林
4-carene	4-蒈烯
ossotide	骨肽
secretin	胰泌素
sorbitol	山梨醇
geranial	香叶醛
heptenal	庚烯醛
i-butene	i-丁烯
mitotane	米托坦
naringin	柚皮苷
ubenimex	乌苯美司
diaspore	硬铝石
curosurf	固尔苏
ester-30	酯-30
afatinib	阿法替尼
aggrecan	聚集蛋白聚糖
catechol	邻苯二酚
3-nonene	3-壬烯
dacromet	达克罗
enantone	抑那通
geraniol	香叶醇
glargine	优泌林
fenthion	倍硫磷
fernenol	羊齿烯醇
bellkute	百可得
benzoate	安息香酸酯
cadinene	杜松烯
copeptin	和肽素
picotite	铬尖晶石
ribozyme	核酶
o-xylene	邻二甲苯
honokiol	和厚朴酚
mepiquat	助壮素
lupenone	羽扇烯酮
Xinhuosu	新活素
thiazone	噻酮
thionine	硫堇
survivin	生存蛋白
pindolol	吲哚洛尔
nystatin	制霉菌素
oryzanol	谷维素
myriocin	多球壳菌素
Nephrite	软玉
tween 40	吐温40
Tween-60	吐温60
warfarin	华法林
γ-costol	γ-木香醇
arundoin	芦竹素
eicosane	二十烷
flumorph	氟吗啉
imipenem	亚胺培南
anethole	茴香脑
protease	蛋白酶
palmitol	棕榈醇
parylene	聚对二甲苯
neuropad	欧米诺
p,p'-DDT	4,4'-滴滴涕
vanillin	香草醛
iodoform	碘仿
gibbsite	三水铝石
cyperone	香附酮
chavicol	黑椒酚
aglycone	糖苷配基
antracol	安泰生
carmofur	卡莫氟
CellCept	骁悉
chromone	防风色原酮
electrum	银金矿
etodolac	依托度酸
allanite	褐帘石
1-decyne	1-癸炔
prunasin	野樱苷
p-thymol	对百里酚
nitrofen	除草醚
ohchinal	印楝醛
indoline	吲哚啉
inositol	肌醇
α-cedrol	α-雪松醇
Spermine	精胺
scopolin	东莨菪苷
sinensal	甜橙醛
tabanone	烟酮
zileuton	齐留通
βelemene	β榄香烯
lactitol	乳糖醇
loxapine	洛沙平
mancozeb	代森锰锌
pentanol	戊醇
ilmenite	钛铁矿
creatine	肌酸
boscalid	啶酰菌胺
Atomolan	阿拓莫兰
acephate	乙酰甲胺磷
farrerol	杜鹃素
gingerol	姜辣素
goethite	针铁矿
orpiment	雌黄
menthene	薄荷烯
leucogen	利可君
methanol	甲醇
ylangene	依兰烯
β-ionone	β-紫罗兰酮
γelemene	γ榄香烯
Q enzyme	q酶
tosilate	对甲苯磺酸盐
pachyman	茯苓多糖
physcion	大黄素甲醚
limettin	柠檬内酯
magnolol	厚朴酚
butylate	丁草特
cedrenol	雪松烯醇
bilesalt	胆盐
alkaline	碱
etrimfos	乙嘧硫磷
3-nonyne	3-壬炔
4-octyne	4-辛炔
ammeline	三聚氰酸二酰胺
Allozyme	等位酶
1-octane	1-辛烷
arginine	精氨酸
phosgene	光气
piclorma	氨氯吡啶酸
propofol	丙泊酚
itopride	伊托必利
onconase	豹蛙酶
α-elemol	α-榄香醇
siderite	菱铁矿
rhodinol	玫瑰醇
silicene	硅烯
pimarane	海松烷
urethane	乌拉坦
tungsten	钨
trapidil	曲匹地尔
aesculin	秦皮甲素
cefepime	头孢吡肟
chrysene	屈
Diprivan	得普利麻
fucoidan	岩藻聚糖硫酸酯
galangin	高良姜素
gasoline	汽油
apocynin	夹竹桃麻素
biphenyl	联苯
calamene	白菖烯
cycloate	草灭特
enniatin	恩镰孢菌素
epsomite	泻利盐
flavonol	黄酮醇
2-cresol	2-甲酚
3-hexene	3-己烯
probucol	普罗布考
palmital	棕榈醛
hexene-1	己烯-1
imazapyr	咪唑烟酸
orange I	橙黄I
nicotine	烟碱
stearate	硬脂酸酯
Sudan 7B	苏丹红7B
tilidine	替利定
phengite	多硅白云母
piperine	胡椒碱
tween 85	吐温85
anakinra	阿那白滞素
analcime	方沸石
aldicarb	涕灭威
betalain	甜菜红色素
anisatin	莽草毒素
elastase	弹性蛋白酶
dicloran	氯硝胺
fraxetin	秦皮素
turanose	松二糖
zinc ion	锌离子
SYP-1620	烯肟菌胺
syringin	紫丁香苷
phytoene	八氢番茄红素
NaFeEDTA	乙二胺四乙酸铁钠
nitralin	磺乐灵
Oleanane	奥利烷
greigite	四硫化三铁
imazamox	甲氧咪草烟
Bergenin	岩白菜素
bromacil	除草定
butanone	丁酮
caraneol	蒈醇
carotene	胡萝卜素
Adhesion	黏附素
4-cresol	4-甲酚
coenzyme	辅酶
crocin-1	西红花苷-1
asaricin	细辛醚
baclofen	巴氯芬
vobasine	老刺木碱
SYP-9080	四氯虫酰胺
vaseline	凡士林
ricinine	蓖麻碱
Furtulon	氟铁龙
graphene	石墨烯
Lewisite	路易氏剂
lipiodol	碘化油
primer 3	引物3
aluminon	铝试剂
amaranth	苋菜红
agmatine	胍丁胺
cerulein	蛙皮缩胆囊肽
caffeine	咖啡因
fleabane	灯盏细辛
n-hexane	正己烷
Licartin	利卡汀
limonite	褐铁矿
formalin	福尔马林
guaiacol	愈创木酚
heptanal	庚醛
hydrogel	水凝胶
primer 4	引物4
pyruvate	丙酮酸盐
secamine	仲胺
suilysin	猪链球菌溶血素
ventolin	万托林
xanthone	呫吨酮
Eudragit	尤特奇
farnesol	金合欢醇
Bestatin	贝他定
avanavil	阿伐那非
acrylate	丙烯酸酯
triazine	三嗪
thymosin	胸腺肽
tartrate	酒石酸酯
crocin-I	西红花苷-I
actellic	虫螨磷
aluminum	铝元素
alternol	维泰醇
isoprene	异戊二烯
iturin A	伊枯草菌素A
guvacine	去甲基槟榔次碱
flomoxef	氟氧头孢
fluorene	芴
n-hexene	正己烯
prometon	扑灭通
pulegone	胡薄荷酮
rectisol	冷甲醇
tyrosine	酪氨酸
Ebastine	依巴斯汀
clopidol	氯羟吡啶
curcumol	莪术醇
bulnesos	布黎醇
arsenate	砷酸盐
oleamide	油酰胺
pluronic	普朗尼克
thiirane	环硫乙烷
zoxamide	苯酰菌胺
α-citral	α-柠檬醛
α-ionene	α-紫罗烯
santalol	檀香醇
Rishitin	日齐素
polyurea	聚脲
poncirin	枸橘苷
primer I	上游引物I
tryptase	类胰蛋白酶
xylulose	木酮糖
β-lonone	β紫罗兰酮
juglanin	胡桃宁
fuziline	附子灵
gigantol	石斛酚
Perlecan	串珠素
alizarin	茜素
carene-3	蒈烯-3
doxapram	多沙普仑
columbin	咖伦宾
isazofos	氯唑磷
magemite	磁赤铁矿
Nuclease	核酸酶
β-elemol	β-榄香醇
chymosin	凝乳酶
cadalene	卡达烯
amikacin	阿米卡星
docosane	二十二烷
2-nonene	2-壬烯
chalcone	查尔酮
anilofos	莎稗磷
2-hexene	2-己烯
selinene	芹子烯
simazine	西玛津
puerarol	葛根酚
lactasin	乳酶生
infinito	银法利
esterase	酯酶
exorphin	外啡肽
melamine	三聚氰胺
molinate	禾草敌
oxadixyl	恶霜灵
lipase A	脂肪酶A
m-cresol	间甲酚
mecoprop	2甲4氯丙酸
mequinol	对甲氧酚
nitrogen	氮
rotenone	鱼藤酮
selenide	硒化物
oxytocin	催产素
Positron	正电子
urapidil	乌拉地尔
trichlor	九氯
α-benzen	α-榄香素
cephalin	脑磷脂
dulcitol	甜醇
enargite	硫砷铜矿
fagomine	荞麦碱
genistin	染料木苷
glabrone	光甘草酮
acarbose	阿卡波糖
gossypol	棉酚
Rubidium	铷
safranal	藏花醛
oxazepam	奥沙西泮
orange G	橙黄G
lupulone	蛇麻酮
α-costol	α-广木香醇
Octanone	辛酮
graphite	石墨
feldspar	长石英
iodophor	碘伏
prorenin	肾原素
pullulan	普鲁兰多糖
rhidosin	红景天素
Sodalite	方钠石
thallium	铊
tilianin	田蓟苷
dolantin	杜冷丁
crocin-2	西红花苷-2
cutinase	角质酶
anserine	鹅肌肽
bepridil	苄普地尔
bisultap	杀虫双
carbomer	卡波姆
lyticase	溶细胞酶
lemonile	柠檬腈
L-valine	L-缬氨酸
oryzalin	氨磺乐灵
samarium	钐
silicate	硅酸盐
3-hexyne	3-己炔
1-butene	1-丁烯
cefteram	头孢特仑
baicalin	黄芩苷
captafol	敌菌丹
fipronil	氟虫腈
etimicin	依替米星
tibolone	替勃龙
procaine	普鲁卡因
siloxane	硅氧烷
lichenan	地衣多糖
Methomyl	灭多威
acipimox	阿昔莫司
bombesin	蛙皮素
galactan	半乳聚糖
fluoride	氟化物
vaccarin	王不留行黄酮苷
Sudan IV	苏丹红IV
rose red	玫瑰红
myrtenol	桃金娘烯醇
platinum	铂
junipene	刺柏烯
helicase	解旋酶
hydrogen	氢气
coumaran	香豆满
cycluron	环莠隆
alarelin	阿拉瑞林
actinium	锕
tonalide	吐纳麝香
thymonin	百里香素
α-thujin	α-苧烯崖柏烯
primer 5	引物5
orexin B	食欲素B
paraoxon	对氧磷
n-decane	正十烷
m-xylene	间二甲苯
maltitol	麦芽糖醇
kerosene	煤油
camphene	莰烯
carnosol	鼠尾草酚
coronene	晕苯
icaritin	淫羊藿素
cytisine	野靛碱
deguelin	鱼藤素
acutobin	蕲蛇酶
abacavir	阿巴卡韦
3-cresol	3-甲酚
1-decene	1-癸烯
apigenin	芹菜素
Azinphos	谷硫磷
curdione	莪术二酮
corundum	刚玉
urease B	尿素酶B
β-lactam	β-内酰胺
tomatine	番茄碱
pyrazine	吡嗪
perylene	苝
myrtenal	桃金娘烯醛
kautchin	萜烯
losartan	氯沙坦
L-ribose	L-核糖
propanol	丙醇
perforin	穿孔素
nylon 11	尼龙11
myrtanol	桃金娘烷醇
naphthol	萘酚
hexanone	己酮
sedaxane	氟唑环菌胺
selenite	亚硒酸盐
fructose	果糖
furfurol	糖醇
furosine	糠氨酸
dodecene	十二碳烯
elemicin	榄香素
alachlor	甲草胺
androgen	雄激素
collagen	胶原
acid red	酸性红
3-carene	3-蒈烯
2-octene	2-辛烯
nepitrin	假荆芥属苷
n-nonane	正壬烷
p-cymene	对伞花烃
renalase	肾胺酶
Sandofan	杀毒矾
sativene	蒜头素
selenium	硒
Catalase	过氧化氢酶
ioversol	碘佛醇
ecdysone	蜕皮激素
velleral	绒白乳菇醛
selenate	硒酸盐
karanjin	水黄皮素
isoapiol	异芹菜脑
jarosite	黄钾铁矾
psoralen	补骨脂素
orlistat	奥利司他
furfural	糠醛
D-fucose	D-岩藻糖
bulnesol	布藜醇
busulfan	白消安
barbital	巴比妥
arginase	精氨酸酶
aldolase	醛缩酶
adefovir	阿德福韦
7-cetene	7-十六烯
cyanogen	氰根
bronopol	布罗波尔
glycyrol	甘草酚
fumarase	延胡索酸酶
docosene	二十二烯
myrcenol	月桂烯醇
magnolin	木兰脂素
lophenol	7-烯胆烷醇
purpurin	紫色素
rhamnose	鼠李糖
panangin	潘南金
paraffin	石蜡
parishin	巴利森苷
riluzole	利鲁唑
rhothane	滴滴滴
valtrate	缬草素
wuestite	浮氏体
theanine	茶氨酸
Tiadinil	噻酰菌胺
triamine	三胺
propanil	敌稗
odoratin	飞机草素
herpetin	波棱素
humulene	律草烯
shionone	紫菀酮
stannite	黝锡矿
tentoxin	腾毒素
atropine	阿托品
alisol A	泽泻醇A
carbaryl	甲萘威
cardanol	腰果酚
chitosan	壳聚糖
fluorine	氟
drimenin	辛辣木素
2-nonyne	2-壬炔
fenchene	小茴香烯
cotinine	可替宁
arabinan	阿拉伯聚糖
alginate	海藻酸盐
amanitin	鹅膏毒肽
1-hexene	1-己烯
1-octene	1-辛烯
lactofen	乳氟禾草灵
iloprost	伊洛前列素
oroxylin	木蝴蝶素
pearlite	珠光体
tementin	特美汀
visfatin	内脂素
pyridine	吡啶
sanshool	花椒麻味素
β-aescin	β-七叶皂苷
rolipram	咯利普兰
snailase	蜗牛酶
urbacide	福美甲胂
vasicine	鸭嘴花碱
pesticin	鼠疫菌素
moretane	莫烷
muurolol	依兰油醇
oltipraz	奥替普拉
pebulate	克草猛
juncusol	灯心草酚
maaliene	马榄烯
chlorite	绿泥石
digenite	蓝辉铜矿
crocin I	西红花苷I
cyanidin	矢车菊素
cyperene	香附烯
escin Ia	七叶树皂苷Ia
1-nonene	1-壬烯
acridone	吖啶酮
fructone	苹果酯
fumarate	富马酸盐
lotusine	莲心季铵碱
ketimine	酮亚胺
incretin	肠促胰岛素
undecyne	十一炔
pyroline	六茜素
Raney Ni	兰尼镍
Sibelium	西比灵
D-valine	D-缬氨酸
exaltone	环十五酮
copperas	绿矾
carabrol	天名精内酯醇
acetanol	醋丁洛尔
4-nonyne	4-壬炔
3-octenol	3-辛烯醇
beryllium	铍
cefamezin	头孢唑啉钠
bufogenin	蟾毒内酯
butachlor	丁草胺
desmosine	锁链素
doxazosin	多沙唑嗪
ethiprole	乙虫腈
diltiazem	地尔硫卓
ruthenium	钌
tamoxifen	他莫昔芬
σ-elemene	σ-榄烯
L-glycine	L-甘氨酸
guanosine	鸟苷
gingipain	牙龈素
nivalenol	雪腐镰刀菌烯醇
modafinil	莫达非尼
mulberrin	桑皮素
pigeonite	辉石
acoramone	细辛酮
abamectin	阿维菌素
etomidate	依托咪酯
dauricine	蝙蝠葛碱
Crocin-II	西红花苷-II
cyanamide	单氰胺
chloroneb	地茂散
caspase 8	半胱氨酸蛋白酶8
cast iron	铸铁
carotenol	胡萝卜醇
betaxolol	倍他洛尔
benodanil	麦锈灵
aminocarb	灭害威
aspidinol	绵马酚
fullerene	富勒烯
histamine	组胺
ionomycin	离子霉素
polydatin	虎杖苷
triforine	嗪胺灵
voglibose	伏格列波糖
xonotlite	硬硅钙石
α-cedrene	α-柏木烯
sofalcone	索法酮
spodumene	锂辉石
sulfatase	硫酸酯酶
quinolone	喹诺酮
valsartan	缬沙坦
synuclein	神经突触核蛋白
piperonal	胡椒醛
Gomisin R	戈米辛R
kakkalide	葛花苷
Laureth-7	月桂醇聚醚-7
lopinavir	洛匹那韦
Myricetin	杨梅素
2-cadinol	2-杜松醇
alteplase	阿替普酶
biochanin	鹰嘴豆芽素
carvacrol	香芹酚
defibrase	降纤酶
dithizone	双硫腙
D-glucose	D-葡萄糖
clozapine	氯氮平
coniferin	松柏苷
Catoc-ene	卡托辛
albicanol	折叶苔醇
benoxacor	解草酮
terpineol	松油醇
tolvaptan	托伐普坦
valerenol	缬草烯醇
veratrole	藜芦醚
α-fenchol	α-葑醇
α-thiodan	α-硫丹
isobutene	异丁烯
navelbine	诺维本
nodakenin	紫花前胡苷
primer II	下游引物II
thiometen	二甲硫吸磷
zanamivir	扎那米韦
rhodamine	罗丹明
salvicine	沙尔威辛
tephrosin	灰叶素
α-asarone	α-细辛醚
ζ-elemene	ζ-榄香烯
phenytoin	苯妥英钠
piroxicam	吡罗昔康
pollucite	铯榴石
peri acid	周位酸
product 9	产物9
L-proline	L-脯氨酸
l-menthol	l-薄荷醇
invertase	转化酶
n-cetanol	正十六醇
DL-serine	DL-丝氨酸
D-maltose	D-麦芽糖
gardoside	栀子酮苷
hydrolase	水解酶
cephanone	头孢唑酮
complex 1	配合物1
aconitine	乌头碱
amygdalin	苦杏仁苷
austenite	奥氏体
camphanol	莰醇
canrenone	坎利酮
elemenone	榄香烯酮
glucoside	葡萄糖苷
2-Hexanol	2-己醇
oldhamite	陨硫钙石
nonachlor	反式九氯
pentanone	戊酮
perdipine	佩尔地平
perillene	紫苏烯
primer P1	引物P1
prolactin	催乳素
Pyrimorph	丁吡吗啉
polybrene	聚凝胺
icariin A	淫羊藿苷A
heptanone	庚酮
hecogenin	海可皂苷元
meropenem	美罗培南
wilforine	雷公藤次碱
turquoise	绿松石
α-ocimene	α-罗勒烯
Eradicane	茵草敌
Ibrutinib	依鲁替尼
isoxazole	异恶唑
flavonoid	类黄酮
friedelin	木栓酮
captopril	卡托普利
anisidine	茴香胺
diatomite	硅藻土
clevudine	克来夫定
clivorine	山冈橐吾碱
2-octanal	2-辛醛
3-hexenol	3-己烯醇
3-octanal	3-辛醛
4-octanol	4-辛醇
resazurin	刃天青
trazodone	曲唑酮
nilotinib	尼洛替尼
manganese	锰
meloxicam	美洛昔康
metalaxyl	甲霜灵
vatalanib	瓦他拉尼
activin A	激活素A
6-paradol	6-姜酮酚
carbidopa	卡比多巴
belotecan	贝洛替康
cadusafos	硫线磷
caerulein	雨蛙肽
dipentene	双戊烯
topotecan	拓扑替康
theacrine	苦茶碱
yuenkanin	芫根苷
indirubin	靛玉红
L-cystine	L-胱氨酸
menadione	甲萘醌
methylene	亚甲基
propylene	丙烯
saccharin	糖精
prognosis	预后
narcotine	那可汀
molybdate	钼酸盐
pyridoxal	吡哆醛
saponarin	皂草黄苷
triallate	野麦畏
taraxerol	蒲公英赛醇
β-fenchol	β-葑醇
combivent	可必特
cedreneol	柏木烯醇
charantin	苦瓜苷
beraprost	贝前列素
Carazolol	卡拉洛尔
cymoxanil	霜脲氰
deuterium	氘
Humulin R	短效胰岛素
futoamide	凤藤酰胺
2-decenol	2-癸烯醇
aconitate	乌头酸盐
3-pyridol	3-吡啶酚
2-butenal	2-丁烯醛
harpagide	哈巴苷
carbazole	咔唑
[truncated: 29,002 more rows]
